# Supplementary material for: Effect of a proficiency-based progression simulation programme on clinical communication for the deteriorating patient: a randomised controlled trial
Source: PubMed Central journal article supplement — BMJ Open. 2019 Jul 9;9(7):e025992. doi: 10.1136/bmjopen-2018-025992 (PMC6629454; doi:10.1136/bmjopen-2018-025992), 2019-07-09
Supplement: bmjopen-2018-025992.draft_revisions.pdf [file bmjopen-2018-025992.draft_revisions.pdf]

# BMJ Open

BMJ Open is committed to open peer review. As part of this commitment we make the peer review history of every article we publish publicly available.

When an article is published we post the peer reviewers' comments and the authors' responses online. We also post the versions of the paper that were used during peer review. These are the versions that the peer review comments apply to.

The versions of the paper that follow are the versions that were submitted during the peer review process. They are not the versions of record or the final published versions. They should not be cited or distributed as the published version of this manuscript.

BMJ Open is an open access journal and the full, final, typeset and author-corrected version of record of the manuscript is available on our site with no access controls, subscription charges or pay-per-view fees (<http://bmjopen.bmj.com>).

If you have any questions on BMJ Open's open peer review process please email [info.bmjopen@bmj.com](mailto:info.bmjopen@bmj.com)

# BMJ Open

**The effect of a proficiency-based progression simulation programme on clinical handover (ISBAR) performance compared to standard training. A randomised controlled trial.**

|                               |                                                                                                                                                                                                                                                                                                                                                                                                                                                                                                                                                                 |
|-------------------------------|-----------------------------------------------------------------------------------------------------------------------------------------------------------------------------------------------------------------------------------------------------------------------------------------------------------------------------------------------------------------------------------------------------------------------------------------------------------------------------------------------------------------------------------------------------------------|
| Journal:                      | <i>BMJ Open</i>                                                                                                                                                                                                                                                                                                                                                                                                                                                                                                                                                 |
| Manuscript ID                 | bmjopen-2018-025992                                                                                                                                                                                                                                                                                                                                                                                                                                                                                                                                             |
| Article Type:                 | Research                                                                                                                                                                                                                                                                                                                                                                                                                                                                                                                                                        |
| Date Submitted by the Author: | 18-Aug-2018                                                                                                                                                                                                                                                                                                                                                                                                                                                                                                                                                     |
| Complete List of Authors:     | Breen, Dorothy; Cork University Hospital Group, Department of Anaesthesia and Intensive Care; Cork University Hospital<br>O'Brien, Sinead; University College Cork National University of Ireland, School of Nursing and Midwifery<br>McCarthy, Nora; University College Cork National University of Ireland, Medical Education Unit, School of Medicine<br>Gallagher, Anthony; University College Cork National University of Ireland, ASSERT centre<br>Walshe, Nuala; University College Cork National University of Ireland, School of Nursing and Midwifery |
| Keywords:                     | MEDICAL EDUCATION & TRAINING, Quality in health care < HEALTH SERVICES ADMINISTRATION & MANAGEMENT, Handover                                                                                                                                                                                                                                                                                                                                                                                                                                                    |
|                               |                                                                                                                                                                                                                                                                                                                                                                                                                                                                                                                                                                 |

SCHOLARONE™  
Manuscripts

1  
2  
3 The effect of a proficiency-based progression simulation programme  
4  
5 on clinical handover (ISBAR) performance compared to standard  
6  
7 training. A randomised controlled trial  
8  
9

10  
11  
12  
13 1. Dr Dorothy Breen FFARCSI, FCICM, MD\*, Cork University Hospital  
14  
15 and the ASSERT Centre, University College Cork, Cork, Ireland.

16  
17  
18 2. Sinéad O'Brien RGN, MSC, School of Nursing and Midwifery at  
19  
20 University College Cork, Cork Ireland.

21  
22  
23 3. Dr Nora McCarthy MICGP, MMH, School of Medicine, University  
24  
25 College Cork, Cork Ireland

26  
27  
28 4. Prof Anthony G Gallagher PhD, DSc, ASSERT Centre, University  
29  
30 College Cork, Cork, Ireland

31  
32  
33 5. Nuala Walshe RN, MTLHE, MN, School of Nursing and Midwifery,  
34  
35 University College Cork, Cork, Ireland

36  
37  
38 \*Corresponding author Dr Dorothy Breen, [dorothy.breen@hse.ie](mailto:dorothy.breen@hse.ie),  
39  
40 *Department of Intensive Care, Cork University Hospital, Wilton, Cork,*  
41  
42 *Ireland. Tel 00353-21-4546434, Fax 00353-21 4922135*  
43  
44  
45  
46  
47  
48

49 Word Count: 3552 including abstract

50  
51 Key words: Communication, Patient Handoff, Education, Medical  
52  
53 Errors, Simulation Training  
54  
55  
56  
57  
58  
59  
60

1  
2  
3  
4  
5  
6  
7  
8  
9  
10  
11  
12  
13  
14  
15  
16  
17  
18  
19  
20  
21  
22  
23  
24  
25  
26  
27  
28  
29  
30  
31  
32  
33  
34  
35  
36  
37  
38  
39  
40  
41  
42  
43  
44  
45  
46  
47  
48  
49  
50  
51  
52  
53  
54  
55  
56  
57  
58  
59  
60

For peer review only

1  
2  
3 The effect of a proficiency-based progression simulation programme  
4  
5 on clinical handover (ISBAR) performance compared to standard  
6  
7 training. A randomised controlled trial.  
8  
9

## 10 11 12 13 **ABSTRACT**

### 14 15 **Objective**

16  
17 To determine the effectiveness of a proficiency-based progression  
18  
19 training approach to clinical handover (ISBAR) compared to standard  
20  
21 training.  
22  
23

### 24 25 **Design**

26  
27 A randomised controlled trial with three parallel arms.  
28  
29

### 30 31 **Setting**

32  
33 A university setting in Ireland  
34  
35

### 36 37 **Participants**

38  
39 45 third year nursing and 45 final year medical undergraduates  
40  
41 scheduled to undertake interdisciplinary National Early Warning  
42  
43 Score (NEWS) training over a three day period in September 2016.  
44  
45

### 46 47 **Interventions**

48  
49 Participants were prospectively randomised to one of three groups  
50  
51 before undertaking a performance assessment of an ISBAR  
52  
53 communication relevant to a deteriorating patient in a high fidelity  
54  
55

1  
2  
3 simulation facility. The groups were as follows (i) HSE; the national  
4  
5 Health Service Executive NEWS e-learning programme only, (ii) S;  
6  
7 the national e-learning programme plus standard simulation, and  
8  
9 (iii) PBP; the national e-learning programme plus proficiency-based  
10  
11 progression simulation.  
12  
13  
14

### 15 16 Main outcome measures

17  
18 The primary outcome was the proportion in each group reaching a  
19  
20 pre-defined proficiency benchmark comprising a series of pre-  
21  
22 defined steps, errors and critical errors during the performance of a  
23  
24 standardised, high fidelity simulation assessment case which was  
25  
26 recorded and independently scored by two independent blinded  
27  
28 assessors.  
29  
30  
31  
32

### 33 34 Results

35  
36 6.9% (2/29) HSE group and 13% (3/23) of the S group demonstrated  
37  
38 proficiency in comparison to 60% (15/25) of PBP group. The  
39  
40 difference between the HSE and the S group was not statistically  
41  
42 significant (Chi-Square = 0.55, 99%, CI =0.63-0.66, p= 0.63) but was  
43  
44 significant for the difference between PBP group and the HSE group  
45  
46 (Chi-Square = 22.25, CI=0.00-0.00, p < 0.000) and between the S  
47  
48 group and the PBP group (Chi-Square = 11.04, CI=0.00-0.00, p =  
49  
50 0.001).  
51  
52  
53  
54  
55  
56  
57  
58  
59  
60

## Conclusions

Proficiency-based progression is a more effective way to teach ISBAR communication than e-learning either alone or in combination with standard simulation.

## Trial Registration

ClinicalTrials.gov Identifier: NCT02886754

## STRENGTHS AND LIMITATIONS OF THE STUDY

- This is the first randomised controlled trial of a proficiency-based progression educational intervention for a non-technical skill (handover).
- The performance outcomes are robust objective measurements which do not rely on subjective assessments or learner perceptions.
- Limitations are the single centre design and the future need for the impact of proficiency-based progression programmes on patient outcomes

Funding Statement: This research received no specific grant from any funding agency in the public, commercial or not-for-profit sectors.

Competing interests: All authors have completed the ICMJE uniform disclosure form at [www.icmje.org/coi\\_disclosure.pdf](http://www.icmje.org/coi_disclosure.pdf) and declare: no

1  
2  
3 support from any organisation for the submitted work, no financial  
4  
5 relationships with any organisations that might have an interest in  
6  
7 the submitted work in the previous three years; no other  
8  
9 relationships or activities that could appear to have influenced the  
10  
11 submitted work.  
12  
13  
14

15  
16  
17  
18 Ethical Approval: Institutional review board approval was obtained.  
19  
20 Informed written consent was obtained from all participants.  
21  
22  
23  
24

25  
26 Transparency: The lead author affirms that the manuscript is an  
27  
28 honest, accurate and transparent account of the study being  
29  
30 reported; that no important aspects have been omitted; and that any  
31  
32 discrepancies from the study as planned have been explained.  
33  
34  
35  
36  
37  
38

39 The Corresponding Author has the right to grant on behalf of all  
40  
41 authors and does grant on behalf of all authors, [a worldwide](#)  
42  
43 [licence](#) to the Publishers and its licensees in perpetuity, in all forms,  
44  
45 formats and media (whether known now or created in the future), to  
46  
47 i) publish, reproduce, distribute, display and store the Contribution,  
48  
49 ii) translate the Contribution into other languages, create  
50  
51 adaptations, reprints, include within collections and create  
52  
53  
54  
55  
56  
57  
58  
59  
60



1  
2  
3 summaries, extracts and/or, abstracts of the Contribution, iii) create  
4  
5 any other derivative work(s) based on the Contribution, iv) to exploit  
6  
7 all subsidiary rights in the Contribution, v) the inclusion of electronic  
8  
9 links from the Contribution to third party material where-ever it may  
10  
11 be located; and, vi) licence any third party to do any or all of the  
12  
13 above.  
14  
15  
16  
17  
18  
19  
20

21 Data sharing: Consent was not obtained for data sharing but the  
22  
23 presented data are anonymised and risk of identification is low.  
24  
25  
26  
27

## 28 **Introduction**

29  
30  
31 Good clinical communication between health care workers is  
32  
33 paramount to patient safety. Communication failures are a significant  
34  
35 source of medical error and preventable adverse events equal if not  
36  
37 greater than errors due lack of technical skill <sup>1, 2, 3</sup>. The need for high  
38  
39 quality structured communication has become urgent as  
40  
41 organisations and medical therapies become more complex, patients  
42  
43 have a greater degree of comorbidity and physicians move towards  
44  
45 shift patterns of work.  
46  
47  
48  
49  
50  
51  
52

53  
54 Communication in relation to the acutely deteriorating patient  
55  
56 demands the most efficient, concise and accurate flow of information  
57  
58  
59  
60

1  
2  
3 amongst healthcare workers of different disciplines for the best  
4  
5 outcome to be achieved. Many healthcare services and providers  
6  
7 have adopted the structured communication tool ISBAR (Identify,  
8  
9 Situation, Background, Assessment, Recommendation) for this  
10  
11 purpose although several other models exist<sup>4</sup>. The widespread desire  
12  
13 to use communication tools in clinical practice mandates the need for  
14  
15 a valid, reliable education and outcomes-based training programme  
16  
17 to ensure a proficient workforce.  
18  
19  
20  
21  
22  
23

24 Early Warning Scores facilitate early detection of deterioration by  
25  
26 categorising a patient's severity of illness and prompting escalation  
27  
28 of care at specific trigger points utilising a structured communication  
29  
30 tool such as ISBAR. This enables a more timely response using a  
31  
32 common language<sup>5</sup>. Ireland was one of the first countries to agree  
33  
34 and implement a standardised Early Warning Score (The National  
35  
36 Early Warning Score, NEWS) across the entire acute hospital sector.  
37  
38 NEWS utilises the ISBAR tool as the recommended structured  
39  
40 communication tool for the acutely deteriorating patient<sup>5, 6</sup>. The  
41  
42 Health Service Executive (HSE) in Ireland recommends the National  
43  
44 Early Warning Score (NEWS) e-learning education programme as  
45  
46 part of a mandatory interdisciplinary education programme for all  
47  
48 healthcare professionals working in acute services. The programme  
49  
50  
51  
52  
53  
54  
55  
56  
57  
58  
59  
60

1  
2  
3 teaches ISBAR as the recommended tool to escalate care in the  
4  
5 context of NEWS and the acutely deteriorating patient.  
6  
7

8  
9 Proficiency-based progression (PBP) training is a form of outcome  
10 based training that involves training individuals to a "proficiency  
11 benchmark." The benchmark is set as the mean performance of  
12 clinicians who undertake the procedure regularly in clinical practice.  
13  
14 It has been shown to improve the performance of individuals  
15 undertaking technical procedures (7, 8, 9, 10, 11, 12, 13). This  
16 approach has not previously been applied to simulation based  
17 training for non-technical skills such as communication.  
18  
19  
20  
21  
22  
23  
24  
25  
26  
27  
28  
29

## 30 **Methods**

### 31 **Objective**

32  
33  
34 The primary aim of the study was to determine the effectiveness on  
35  
36 ISBAR performance of a proficiency-based progression (PBP)  
37 simulation programme when compared with the same simulation  
38 programme without the proficiency requirement and compared with  
39 the national e-learning programme alone.  
40  
41  
42  
43  
44  
45  
46  
47  
48

### 49 **Study design**

50  
51 A randomised controlled trial with three parallel arms.  
52  
53

### 54 **Participants**

1  
2  
3 Eligible participants were 109 third year nursing and 201 final year  
4  
5  
6 medical students who were scheduled to undertake interdisciplinary  
7  
8 National Early Warning Score training in September 2016 as part of  
9  
10 their undergraduate curriculum. This comprised the entire  
11  
12 undergraduate nursing and medical classes except for 31 medical  
13  
14 students who were scheduled to undertake this training at a later  
15  
16 time in the curriculum (figure 1).  
17  
18  
19

## 20 21 **Interventions**

22  
23 All 3<sup>rd</sup> year nursing and final year medical students were emailed  
24  
25 prior to training and instructed to undertake the National Early  
26  
27 Warning Score e-learning programme. Written informed consent  
28  
29 was obtained from all participants. On the day of training,  
30  
31 participants were required to submit a certificate of successful  
32  
33 completion of the e-learning programme. A 15-minute lecture on the  
34  
35 ISBAR tool was delivered before participants undertook training as  
36  
37 per their allocated groups. Students were not notified as to which  
38  
39 study group they were allocated. The study flow is outlined in figure  
40  
41  
42  
43  
44  
45  
46  
47 2.

48  
49 The three training groups were as follows:

50  
51  
52 **(i) e-learning only group (HSE).** Participants in this group  
53  
54 proceeded directly to the high fidelity suite for performance  
55  
56  
57  
58  
59

1  
2  
3 assessment. After outcome assessment was complete, participants  
4  
5 undertook simulation training similar to the S group in order to  
6  
7 ensure that all students were afforded the same training opportunity.  
8  
9

10 **(ii) e-learning plus standard simulation group (S).** Participants  
11  
12 worked in pairs of a medical student and nursing student. If a  
13  
14 participant did not have a partner, then a non-study peer student was  
15  
16 asked to pair with that individual for the purposes of training. Data  
17  
18 from the non-study student was not included in the analysis.  
19  
20

21  
22 Training consisted of a series of simulated phone calls using four  
23  
24 standardised paper cases for each discipline. Case materials included  
25  
26 case notes, NEWS charts, and a blank ISBAR template indicating the  
27  
28 categories and type of information that should be communicated.  
29  
30 Each scenario had a deteriorating patient event that necessitated an  
31  
32 ISBAR telephone communication. Participants alternated between  
33  
34 making and receiving simulated phone calls. A standardised script  
35  
36 was given to the recipient. Two facilitators conducted the simulation  
37  
38 training. Both facilitators were experienced clinicians and educators  
39  
40 who had previously undergone the “Train the Trainer NEWS  
41  
42 programme” and regularly facilitate NEWS training and healthcare  
43  
44 simulation. The facilitators offered support and feedback in line with  
45  
46 standard NEWS training by listening to simulated phone calls and  
47  
48  
49  
50  
51  
52  
53  
54  
55  
56  
57  
58  
59  
60

1  
2  
3 offering feedback on the ISBAR framework and by answering  
4  
5 questions as they arose. Participants were required to work through  
6  
7 all four cases with their partner. Towards the end of the training  
8  
9 session the participants presented to the facilitator to repeat a  
10  
11 simulated phone call for either case 3 or 4. The training session was  
12  
13 3.5 hours in duration, participants were required to stay until the end  
14  
15 of the training regardless of progress. If an individual had completed  
16  
17 all the cases, they were asked to assist by continuing to be the  
18  
19 recipient of phone calls for their partner or by continuing to practice  
20  
21 by repeating the cases if required.  
22  
23  
24  
25  
26  
27

28 **(iii) e-learning plus proficiency-based progression simulation**  
29 **group (PBP).** Participants underwent a training programme of the  
30  
31 same structure, duration, content and facilitator: student ratio as the  
32  
33 S group. The same two facilitators facilitated both the S and PBP  
34  
35 training. However in the PBP group, partners scored each other's  
36  
37 phone calls during training against a series of pre-defined metrics  
38  
39 (quantified as steps, errors and critical errors for each case) on a  
40  
41 score sheet to ascertain if the proficiency benchmark for that case  
42  
43 was reached. Partners shared the results of the metrics and  
44  
45 proficiency scores with each other as feedback at the end of each  
46  
47 simulated phone call. If proficiency was not achieved the case was  
48  
49  
50  
51  
52  
53  
54  
55  
56  
57  
58  
59  
60

1  
2  
3 repeated before progressing to the next case. Participants were  
4  
5 required to reach proficiency on all four cases with their partner  
6  
7 before performing case 3 or 4 with the facilitator and demonstrating  
8  
9 proficiency again. If proficiency was not achieved with the facilitator  
10  
11 then the participant returned to repeat cases with their partner and  
12  
13 present for reassessment to the facilitator until proficiency was  
14  
15 demonstrated.  
16  
17  
18  
19  
20  
21

## 22 **Outcomes**

23  
24  
25 The primary outcome was the ability to reach the proficiency  
26  
27 benchmark on the standardised high-fidelity simulation assessment  
28  
29 case. The secondary outcomes were the number of successfully  
30  
31 completed steps, errors and critical errors performed by each group.  
32  
33  
34  
35

36  
37 Performance metrics were developed for the training cases and for  
38  
39 the high fidelity simulation assessment case as part of a pilot study in  
40  
41 the previous year. Each case presented a different but commonly  
42  
43 encountered clinical scenario of an acutely deteriorating patient. The  
44  
45 metrics were derived for each of the training and assessment cases  
46  
47 according to the 5 components of the ISBAR tool were specific for  
48  
49 each case.  
50  
51  
52  
53  
54  
55  
56  
57  
58  
59  
60

1  
2  
3 The performance metrics were validated through a modified Delphi  
4  
5 expert panel consisting of 9 senior nurses and 8 medical staff who  
6  
7 regularly facilitate NEWS/ISBAR communication training. Delphi  
8  
9 panel members reviewed the performance metric for each of the  
10  
11 simulation cases and the high fidelity performance outcome case and  
12  
13 metric units were included, excluded or modified by consensus. Each  
14  
15 metric unit was then classified as a step, error or critical error by  
16  
17 consensus. The majority of metrics were common to both medicine  
18  
19 and nursing. The number of metrics per case ranged from 24-26.  
20  
21

22  
23  
24  
25  
26 The proficiency benchmark was set as the mean performance of  
27  
28 qualified personnel from the respective disciplines on each case. Nine  
29  
30 nursing and five medically qualified practitioners (who regularly  
31  
32 escalate care in the acute healthcare setting and with a mean years of  
33  
34 experience=3 years) underwent the high fidelity simulation case. The  
35  
36 proficiency benchmark for the assessment case was set as the mean  
37  
38 performance for each discipline as scored by two independent  
39  
40 assessors.  
41  
42  
43  
44  
45

46  
47 Digital recordings of each participant's performance of the  
48  
49 standardised case in the high fidelity assessment suite were  
50  
51 reviewed and scored by two independent assessors (experienced  
52  
53 acute care nurses) using the pre-defined metrics and proficiency  
54  
55  
56  
57  
58  
59  
60



1  
2  
3 benchmark. The assessors underwent training on scoring the  
4  
5 material using 10 recordings of the same case obtained from non-  
6  
7 study participants. An inter-rater reliability of > 85% was achieved  
8  
9 prior to commencing scoring study material. The assessors were not  
10  
11 part of the investigator group, were blinded to the study group  
12  
13 allocations and had no prior knowledge of any of the participants.  
14  
15  
16  
17  
18  
19  
20

### 21 **Sample size**

22  
23 Power calculation: the numbers needed in each arm was based on  
24  
25 transfer of training (ToT) observed in previous studies of proficiency  
26  
27 based progression simulation in surgery and cardiology, where ToT  
28  
29 rates of 42-69% have been observed <sup>7, 8, 9, 10, 11, 12</sup>. In a pilot for the  
30  
31 current study on 133 medical and nursing students in the previous  
32  
33 academic year, the TOT was observed to be 16% for the proficiency  
34  
35 based training group and 3% for the simulation. The pilot however  
36  
37 was constrained by the existing curriculum, which only allowed for  
38  
39 90 minutes training time once the e-learning programme was  
40  
41 complete. In the current study a longer training time (3.5 hours) and  
42  
43 a more rigorous structure was facilitated. We therefore expected to  
44  
45 observe an increase in ToT to >40% based on a 3 fold increase in  
46  
47 objective, blind, assessment of proficiency when compared to the  
48  
49  
50  
51  
52  
53  
54  
55  
56  
57  
58  
59  
60

1  
2  
3 control group (i.e. 9% for the HSE group vs. 49% for the PBP group).  
4  
5 A two -tailed test, with n=20 trainees in each group with an alpha of  
6  
7 5% (which corresponds to a 95% confidence interval) would yield a  
8  
9 statistical power of 89.9. Therefore 30 (15 medical and 15 nursing  
10  
11 students) were randomised to each group to allow for drop out rates  
12  
13 observed in the pilot due to students rescheduling to non-study  
14  
15 training dates as a result of conflicting demands of their curriculum.  
16  
17  
18  
19

### 20 21 **Randomisation and blinding**

22  
23 A de-identified list of nursing and medical student numbers was  
24  
25 obtained from the School of Nursing and Midwifery and the School of  
26  
27 Medicine. The lists comprised 109 third year nursing and 201 final  
28  
29 year medical students scheduled to complete an interdisciplinary  
30  
31 ISBAR training programme as part of the University undergraduate  
32  
33 curriculum in September 2016. Randomisation was stratified by  
34  
35 discipline and was conducted using a computer-generated  
36  
37 programme (GraphPad) as a two-stage process (figure 1).  
38  
39  
40  
41  
42  
43

44 Firstly n=45 nursing and n=45 medical students were randomly  
45  
46 selected using the programme. Secondly, participants were randomly  
47  
48 allocated by discipline using the same computer programme to one  
49  
50 of the three training groups: HSE, S, and PBP. Subjects were excluded  
51  
52 from the study if: (i) a certificate of successful completion (within the  
53  
54  
55  
56  
57  
58  
59  
60

1  
2  
3 previous 4 weeks) of the National Early Warning Score (NEWS) e-  
4  
5 learning education programme was not presented on the day of  
6  
7 training, (ii) lack of consent.  
8  
9

10 Two independent assessors who undertook scoring of performance  
11  
12 for the assessment case were blinded to student allocations. The  
13  
14 assessors had no prior knowledge of the students. The participants  
15  
16 were not informed of the training group to which they were  
17  
18 allocated.  
19  
20  
21  
22

### 23 **Statistical analysis**

24  
25 Statistical Analysis was performed with SPSS 22 (Armonk, New  
26  
27 York). The Kruskal-Wallis test was used to determine if there was a  
28  
29 statistical difference between groups in relation to the primary end  
30  
31 point (the numbers reaching proficiency) and the secondary end  
32  
33 points (the number of completed steps, errors and critical errors).  
34  
35 The relationship of the three training programmes on proficiency  
36  
37 was explored using logistic regression analysis.  
38  
39  
40  
41  
42  
43

### 44 **Patient and Public Involvement**

45  
46 Patients were not involved in the design or conduct of the study.  
47  
48

### 49 **Results**

50  
51 Baseline characteristics with respect to age, gender, discipline,  
52  
53 nationality and first language of the participants in each group are  
54  
55  
56  
57  
58  
59  
60

1  
2  
3 shown in table 1. Figure 3 shows percentages of participants in each  
4  
5 group who demonstrated the proficiency benchmark following  
6  
7 assessment in the high fidelity simulation suite. At the end of  
8  
9 training, 6.9% (2/29) of the e-learning only (HSE) group and 13 %  
10  
11 (3/23) of the standard simulation (S) group demonstrated  
12  
13 proficiency. In comparison 60% (15/25) of proficiency-based  
14  
15 progression simulation (PBP) group were proficient. The difference  
16  
17 between the HSE and the S group was not statistically significant  
18  
19 (Chi-Square = 0.55, 99%, CI =0.63-0.66, p= 0.63) but was significant  
20  
21 for the difference between PBP Group and the HSE Group (Chi-  
22  
23 Square = 22.25, CI=0.00-0.00, p < 0.000) and between the S group  
24  
25 and the PBP group (Chi-Square = 11.04, CI=0.00-0.00, p = 0.001).

26  
27  
28  
29  
30  
31  
32  
33  
34  
35  
36 On logistic regression analysis (figure 4) it was found that in  
37  
38 comparison to the HSE group, the S group were 2 times as likely to  
39  
40 demonstrate proficiency, whereas the PBP group were more than 20  
41  
42 times as likely i.e. the difference between HSE and S groups was not  
43  
44 statistically different (Ext (B) =2.04, 95% CI=0.31-13.28, p=0.46) but  
45  
46 was statistically significant for the difference between the PBP and  
47  
48 HSE groups (Ext (B) =20.25, 95% CI=3.91-105, p<0.000).

1  
2  
3 The PBP group completed significantly more steps, mean 8.5 (1.7)  
4  
5 than either the HSE, mean 5.8 (1.6),  $p < 0.000$  or S, mean 6.3 (2.1),  
6  
7  $p < 0.000$  group. Similarly, combined errors and critical errors were  
8  
9 significantly less in the PBP, mean 3.7 (1.6) than the HSE, mean 5.9  
10  
11 (2.1),  $p < 0.000$  or S, mean 5.2 (1.5),  $p < 0.01$  group. Inter-rater  
12  
13 reliability of the two assessors was 97%.  
14  
15  
16  
17  
18  
19

## 20 **Discussion**

21  
22  
23 Our results shows that addition of a proficiency-based progression  
24  
25 simulation programme to an e-learning module can deliver a  
26  
27 superior set of skills for ISBAR communication than an e-learning  
28  
29 module either alone or in combination with standard simulation.  
30  
31 Furthermore this benefit is seen with the same resources i.e.  
32  
33 materials, timeframe, and facilitators as standard simulation. The  
34  
35 Irish health service like its international counterparts has prioritised  
36  
37 clinical communication as a key part of the patient safety agenda <sup>5, 6,</sup>  
38  
39 <sup>14, 15, 16.</sup> Clinical communication is now viewed as an essential skill  
40  
41 and training is recommended as mandatory for all health and social  
42  
43 care professionals <sup>6.</sup> All participants were required to produce a  
44  
45 recent certificate of successful completion of the e-learning  
46  
47 programme but only 6.9% of the group who undertook the e-learning  
48  
49  
50  
51  
52  
53  
54  
55  
56  
57  
58  
59  
60

1  
2  
3 module demonstrated the proficiency benchmark. The addition of  
4  
5 standard simulation did not significantly improve performance with  
6  
7 only 13% of the S group reaching the benchmark. It could be argued  
8  
9 that exposure to metrics-based scoring in the practice cases resulted  
10  
11 in better performance in the assessment case for the PBP group.  
12  
13 However this is precisely the desired effect i.e. that trainees know  
14  
15 what skills need to be achieved, practice to achieve them to an  
16  
17 objective pre-defined standard and transfer that training to a  
18  
19 dynamic scenario. The S and PBP groups differed in only two  
20  
21 respects: (i) practice was “repeated” in the S cohort as opposed to  
22  
23 “deliberate” in PBP cohort i.e. focused on pre-defined metrics and (ii)  
24  
25 the PBP group was required to reach proficiency benchmarks to  
26  
27 progress through simulation cases whereas the S group were not.<sup>17</sup>  
28  
29 Our results demonstrate that proficiency-based training can achieve  
30  
31 skill acquisition rates of the order of 60%, similar to those seen with  
32  
33 technical skills using this approach. In a study of similar  
34  
35 experimental design, Angelo et al found that there were 56% fewer  
36  
37 intraoperative errors and 69% fewer critical errors when compared  
38  
39 to traditional training<sup>8</sup>. To our knowledge our study is the first  
40  
41 randomised trial of proficiency-based progression training of a non-  
42  
43 technical skill.  
44  
45  
46  
47  
48  
49  
50  
51  
52  
53  
54  
55  
56  
57  
58  
59  
60

1  
2  
3 The main strength of the study is the use of robust methodology to  
4  
5 determine the effectiveness of an educational intervention on  
6  
7 objectively assessed performance outcomes. The study combines the  
8  
9 rigour of a randomised controlled trial with that of an outcomes  
10  
11 based- training approach (proficiency-based progression) to clinical  
12  
13 handover. A significant body of evidence already exists in relation to  
14  
15 the use of proficiency-based progression for technical skill  
16  
17 acquisition <sup>7, 8, 9, 10, 11, 12, 13</sup>. Our results support the use of proficiency-  
18  
19 based progression training for communication skills also.  
20  
21 Weaknesses of the study include the single centre design and the  
22  
23 application to the undergraduate population only although the  
24  
25 training programme is designed for use by qualified nurses and  
26  
27 doctors also.  
28  
29  
30  
31  
32  
33  
34  
35

36 The study was also limited by the restriction on training time. The  
37  
38 duration of simulation training was extended to 3.5 hours from the  
39  
40 initial pilot (1.5 hours), but was still restricted by the existing  
41  
42 undergraduate curriculum rather than that which would ideally be  
43  
44 required to train a fundamental skill. Furthermore skills  
45  
46 consolidation is an important part of the learning process  
47  
48 particularly for new skills <sup>18</sup>. In the study by Angelo et al. <sup>8</sup> trainees  
49  
50 had a weekend in which to acquire, refine and consolidate their skills  
51  
52  
53  
54  
55  
56  
57  
58  
59  
60

1  
2  
3 before their proficiency assessment at the end of training. Another  
4  
5 difficulty, which may have impinged on the effectiveness of training,  
6  
7 was the disparity in fidelity between the paper-based training  
8  
9 environment and the assessment undertaken in the high fidelity  
10  
11 simulation environment. This disparity is challenging for those with  
12  
13 limited clinical experience such as the undergraduate population.  
14  
15 Van Sickle et al <sup>9</sup> and Gallagher et al <sup>10</sup> have commented on the  
16  
17 detrimental impact that this disparity can have on proficiency  
18  
19 demonstration by trainees.  
20  
21  
22  
23  
24

25  
26 It is now widely recognised that clinical communication skills  
27  
28 underpin patient safety. Implementation of a training programme in  
29  
30 relation to clinical handover has already been shown to reduce  
31  
32 medical error and preventable adverse events <sup>19</sup>. There is a need for  
33  
34 valid, reliable, cost efficient clinical handover training programmes to  
35  
36 address this need and the impact on patient as well as healthcare  
37  
38 provider outcomes.  
39  
40  
41  
42  
43

## 44 **Conclusion**

45  
46 Proficiency-based progression is a more effective way to teach ISBAR  
47  
48 communication than e-learning either alone or in combination with  
49  
50 standard simulation.  
51  
52  
53  
54  
55  
56  
57  
58  
59  
60



## References

1. Wilson RM, Runciman WB, Gibberd RW, et al. The quality in Australian health care study. *Med J Aust.* 1995;163:458 -71.
2. Bhasale AL, Miller GC, Reid SE, et al. Analysing potential harm in Australian general practice: an incident-monitoring study. *Med J Aust.* 1998;169:73 -6.
3. National Confidential Enquiry into Patient Outcome and Death. Caring to the end? A review of the care of patients who died in hospital within four days of admission. *NCEPOD*, 2009.
4. Riesenber LA, Leitzsch J, Little BW. Systematic review of handoff mnemonics literature. *Am J Med Qual.* 2009;24:196-204.
5. National Clinical Effectiveness Committee. National Early Warning Score, National Clinical Guideline No. 1. <http://health.gov.ie/wp-content/uploads/2014/08/NEWSFull-Report-August2014.pdf>
6. National Clinical Effectiveness Committee. Communication (Clinical Handover) in Acute and Children's Hospital Services, National Clinical Guideline No. 11. <http://health.gov.ie/wp-content/uploads/2015/12/NCG-No-11-Clinical-Handover-Acute-and-Childrens-Hospital-Services-Full-Report.pdf>
7. Gallagher AG, Seymour NE, Jordan-Black JA, Bunting BP, McGlade K, Satava RM. Prospective, randomised assessment of transfer of

1  
2  
3 training (ToT) and transfer effectiveness ratio (TER) of virtual reality  
4 simulation training for laparoscopic skill acquisition. *Ann Surg* 2013;  
5  
6 257(6): 1025-31.  
7  
8

9  
10 8. Angelo RL, Ryu RK, Pedowitz RA, Beach W, Burns J, Dodds J, Field  
11 L et al. A Proficiency-based progression training curriculum coupled  
12 with a model simulator results in the acquisition of a superior  
13 arthroscopic bankart skill set. *Arthroscopy*. 2015; 31(10): 1854-71.  
14  
15

16 9. Van Sickle KR, Ritter EM, Baghai M, Goldenberg AE, Huang  
17 IP, Gallagher AG, Smith CD. Prospective, randomised, double blind  
18 trial of curriculum-based training for intracorporeal suturing and  
19 knot tying. *J Am Coll Surg*. 2008; 207(4): 560-8.  
20  
21

22 10. Gallagher AG, O'Sullivan GC. *Fundamentals of surgical simulation;*  
23 *principles & practices*: London; Springer Verlag, 2011.  
24  
25

26 11. Seymour NE, Gallagher, AG, Roman SA, O'Brien MK, Bansal VK,  
27 Andersen DK, Satava RM. (2002). Virtual reality training improves  
28 operating room performance: results of a randomised, double-  
29 blinded study. *Annals of Surgery*. 2002; 236(4), 458-463.  
30  
31

32 12. Cates CU, Lönn L, Gallagher AG. Prospective, randomised and  
33 blinded comparison of proficiency-based progression full-physics  
34 virtual reality simulator training versus invasive vascular experience  
35 for learning carotid artery angiography by very experienced  
36  
37  
38  
39  
40  
41  
42  
43  
44  
45  
46  
47  
48  
49  
50  
51  
52  
53  
54  
55  
56  
57  
58  
59  
60

1  
2  
3 operators. *BMJ Simulation and Technology Enhanced Learning*. 2016;  
4  
5 2:1-5.  
6

7  
8 13. Ahlberg G, Enochsson L, Gallagher AG, Hedman L et al.  
9

10 Proficiency-based virtual reality training significantly reduces the  
11  
12 error rate for residents during their first 10 laparoscopic  
13  
14 cholecystectomies. *Am J Surg*. 2007; 193: 797-804.  
15  
16

17  
18 14. British Medical Association. Safe handover: safe patients.  
19

20  
21 Guidance on clinical handover for clinicians and managers. London:  
22  
23 *BMA*. 2004. <http://www.bma.org.uk/ap.nsf/Content/Handover>  
24

25  
26 15. Australian Medical Association 2006, Safe Handover-safe  
27  
28 patients: guidance on clinical handover for clinicians and managers.  
29  
30 *AMA*. 2006.  
31

32  
33 [https://ama.com.au/sites/default/files/documents/Clinical\\_Handov](https://ama.com.au/sites/default/files/documents/Clinical_Handover_0.pdf)  
34  
35 [er\\_0.pdf](https://ama.com.au/sites/default/files/documents/Clinical_Handover_0.pdf)  
36  
37

38  
39 16. Joint Commission on Accreditation of Healthcare  
40

41 Organizations. National patient safety goals. *Joint Commission*. 2005.  
42

43  
44 [https://www.jointcommission.org/PatientSafety/NationalPatientSaf](https://www.jointcommission.org/PatientSafety/NationalPatientSafetyGoals/)  
45  
46 [etyGoals/](https://www.jointcommission.org/PatientSafety/NationalPatientSafetyGoals/).  
47

48  
49 17. McGaghie WC. Mastery learning: it is time for medical education  
50  
51 to join the 21st century. *Acad Med*. 2015;90:1438-1441.  
52  
53

18. Keane MT, Eysenck MW. Cognitive Psychology: A student's handbook: *Psychology Press*, 2000.

19. Starmer AJ, Spector ND, Srivastava R, West DC et al. Changes in medical errors after implementation of a handoff program. *N Engl J Med* 2014; 371:1803-1812.

Table 1. Demographic characteristics of the three study groups, HSE, S, PBP.

|                             | National e-learning programme (HSE) | National e-learning programme plus, standard simulation training (S) | National e-learning programme plus proficiency based progression simulation training (PBP) | Total      |
|-----------------------------|-------------------------------------|----------------------------------------------------------------------|--------------------------------------------------------------------------------------------|------------|
|                             | n=30                                | n=30                                                                 | n=30                                                                                       | n=90       |
| <b>Age Group</b>            |                                     |                                                                      |                                                                                            |            |
| 18-23 years (%)             | 21 (70.0%)                          | 19 (63.3%)                                                           | 20 (66.7%)                                                                                 | 60 (66.7%) |
| 24-29 years (%)             | 7 (23.3%)                           | 8 (26.7%)                                                            | 9 (30.0%)                                                                                  | 24 (26.7%) |
| >30 years (%)               | 2 (6.7%)                            | 3 (10.0%)                                                            | 1 (3.3%)                                                                                   | 6 (6.7%)   |
| <b>Gender</b>               |                                     |                                                                      |                                                                                            |            |
| Male (%)                    | 6 (20.0%)                           | 5 (16.7%)                                                            | 6 (20.0%)                                                                                  | 17 (18.9%) |
| Female (%)                  | 24 (80.0%)                          | 22 (83.3%)                                                           | 24 (80.0%)                                                                                 | 73 (81.1%) |
| <b>Discipline</b>           |                                     |                                                                      |                                                                                            |            |
| Nursing (%)                 | 15 (50.0%)                          | 15 (50.0%)                                                           | 15 (50.0%)                                                                                 | 45 (50.0%) |
| Medicine (%)                | 15 (50.0%)                          | 15 (50.0%)                                                           | 15 (50.0%)                                                                                 | 45 (50.0%) |
| <b>Nationality</b>          |                                     |                                                                      |                                                                                            |            |
| Irish (%)                   | 22 (73.3%)                          | 24 (80.0%)                                                           | 21 (70.0%)                                                                                 | 67 (74.4%) |
| Non-Irish (%)               | 8 (26.7%)                           | 6 (20.0%)                                                            | 9 (30.0%)                                                                                  | 23 (25.6%) |
| <b>First Language</b>       |                                     |                                                                      |                                                                                            |            |
| English (%)                 | 25 (83.3%)                          | 22 (73.3%)                                                           | 19 (63.3%)                                                                                 | 66 (73.3%) |
| Other (%)                   | 5 (16.7%)                           | 4 (13.3%)                                                            | 7 (23.3%)                                                                                  | 16 (17.8%) |
| Not available (%)           | -                                   | 4 (13.3%)                                                            | 4 (13.3%)                                                                                  | 8 (8.9%)   |
| % = % within research group |                                     |                                                                      |                                                                                            |            |

## Figure legends

Figure 1. Consort diagram outlining selection, allocation and follow up of undergraduate medical and nursing participants in a study

1  
2  
3 comparing the effect of e-learning, standard and proficiency-based  
4  
5 progression simulation training for ISBAR performance.  
6  
7  
8  
9

10  
11 Figure 2. Outline of experimental design and study flow indicating  
12  
13 training interventions and assessment of the three study training  
14  
15 groups of undergraduate medical and nursing participants HSE, S and  
16  
17 PBP.  
18  
19  
20  
21  
22

23  
24 Figure 3. The percentages reaching the proficiency benchmark at the  
25  
26 end of training of the three study training groups of undergraduate  
27  
28 medical and nursing participants HSE, S and PBP.  
29  
30  
31  
32

33  
34 Figure 4. Logistic regression analysis for the relative differences  
35  
36 between the three study training groups of undergraduate medical  
37  
38 and nursing participants HSE, S and PBP.  
39  
40  
41  
42  
43  
44  
45  
46  
47  
48  
49  
50  
51  
52  
53  
54  
55  
56  
57  
58  
59  
60

1  
2  
3  
4  
5  
6  
7  
8  
9  
10  
11  
12  
13  
14  
15  
16  
17  
18  
19  
20  
21  
22  
23  
24  
25  
26  
27  
28  
29  
30  
31  
32  
33  
34  
35  
36  
37  
38  
39  
40  
41  
42  
43  
44  
45  
46  
47  
48  
49  
50  
51  
52  
53  
54  
55  
56  
57  
58  
59  
60

view only

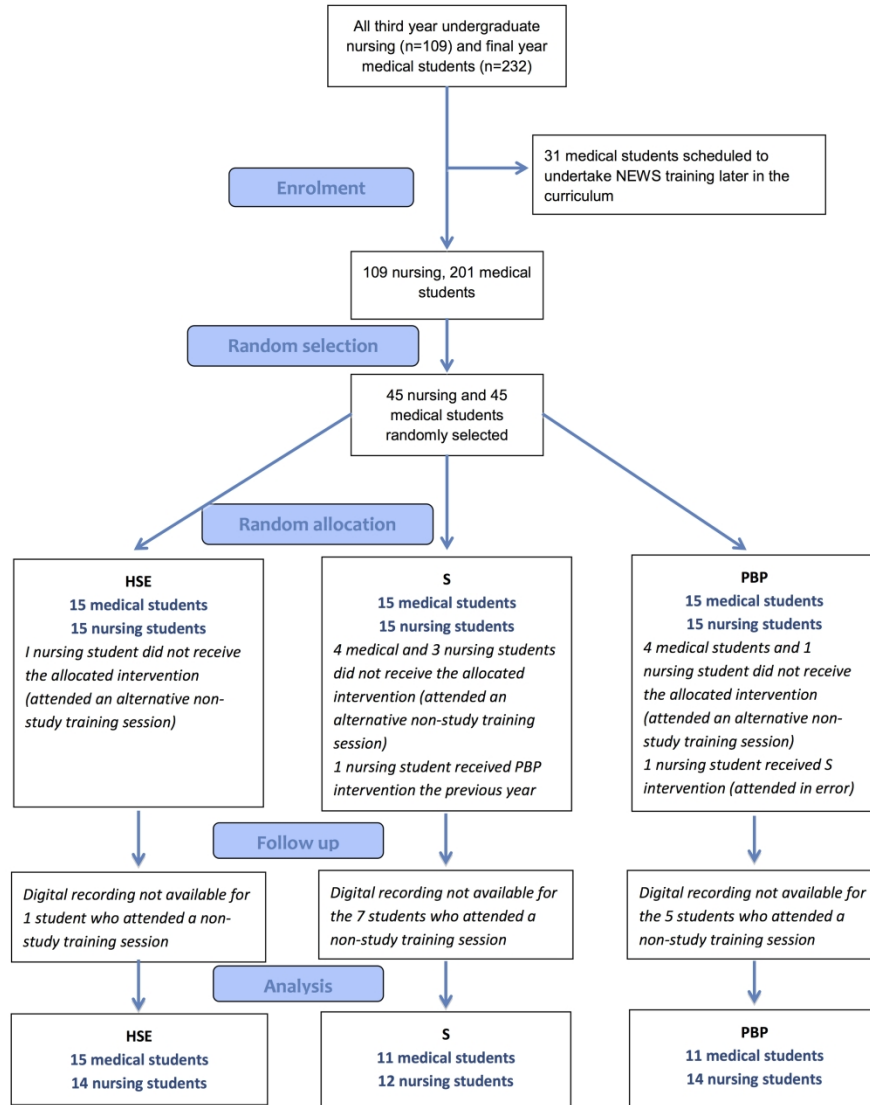

45  
46  
47  
48  
49  
50  
51  
52  
53  
54  
55  
56  
57  
58  
59  
60

Figure 1. Consort diagram outlining selection, allocation and follow up of undergraduate medical and nursing participants in a study comparing the effect of e-learning, standard and proficiency-based progression simulation training for ISBAR performance.

279x361mm (300 x 300 DPI)

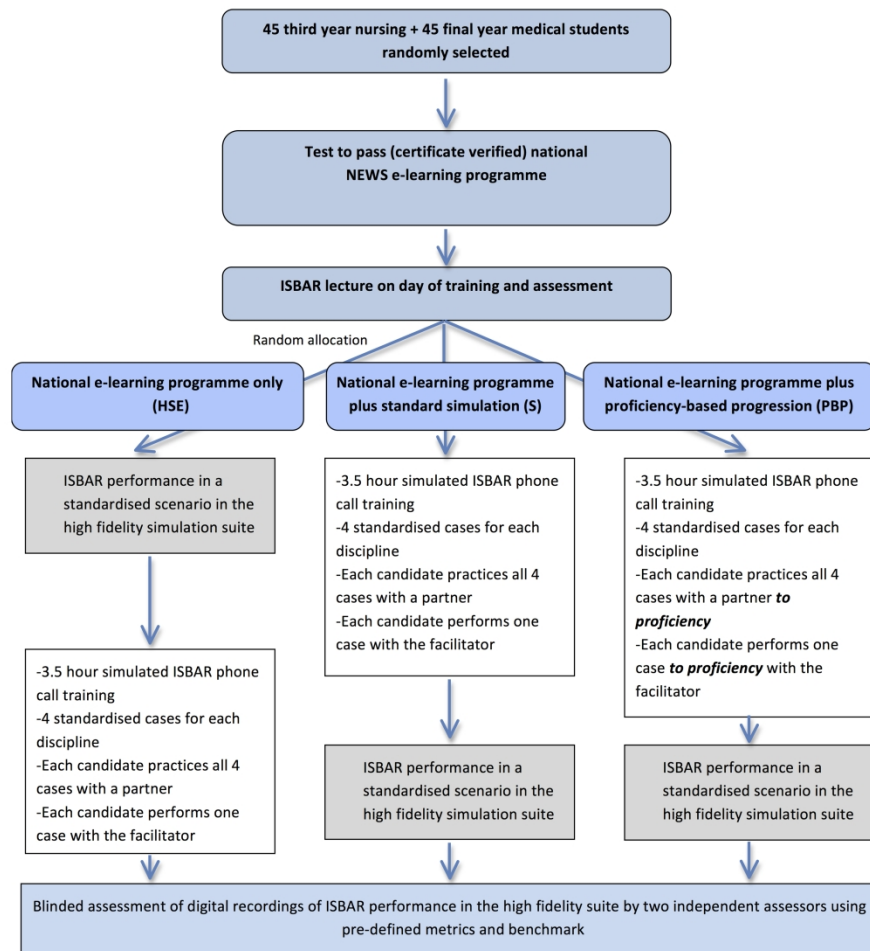

Figure 2. Outline of experimental design and study flow indicating training interventions and assessment of the three study training groups of undergraduate medical and nursing participants HSE, S and PBP.

279x361mm (300 x 300 DPI)



1  
2  
3  
4  
5  
6  
7  
8  
9  
10  
11  
12  
13  
14  
15  
16  
17  
18  
19  
20  
21  
22  
23  
24  
25  
26  
27  
28  
29  
30  
31  
32  
33  
34  
35  
36  
37  
38  
39  
40  
41  
42  
43  
44  
45  
46  
47  
48  
49  
50  
51  
52  
53  
54  
55  
56  
57  
58  
59  
60

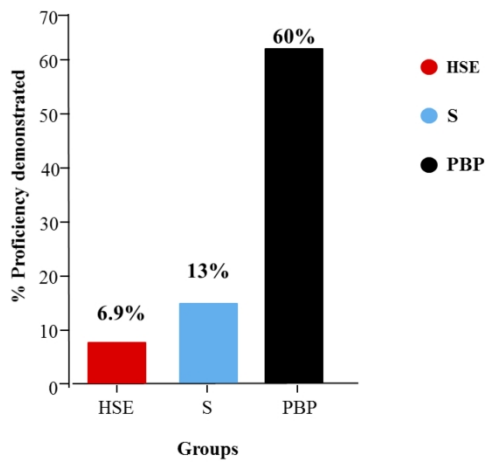

Figure 3. The percentages reaching the proficiency benchmark at the end of training of the three study training groups of undergraduate medical and nursing participants HSE, S and PBP.

296x419mm (300 x 300 DPI)

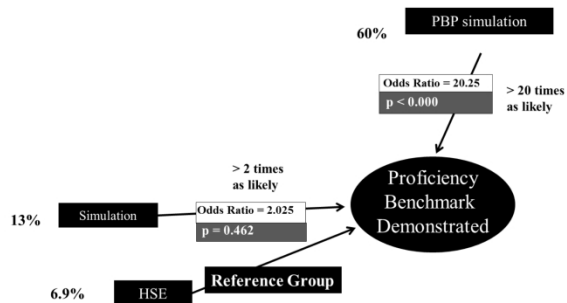

Figure 4. Logistic regression analysis for the relative differences between the three study training groups of undergraduate medical and nursing participants HSE, S and PBP.

296x419mm (300 x 300 DPI)

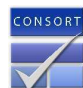

## CONSORT 2010 checklist of information to include when reporting a randomised trial\*

| Section/Topic                    | Item No | Checklist item                                                                                                                                                                              | Reported on page No   |
|----------------------------------|---------|---------------------------------------------------------------------------------------------------------------------------------------------------------------------------------------------|-----------------------|
| <b>Title and abstract</b>        |         |                                                                                                                                                                                             |                       |
|                                  | 1a      | Identification as a randomised trial in the title                                                                                                                                           | 1                     |
|                                  | 1b      | Structured summary of trial design, methods, results, and conclusions (for specific guidance see CONSORT for abstracts)                                                                     | 1-3                   |
| <b>Introduction</b>              |         |                                                                                                                                                                                             |                       |
| Background and objectives        | 2a      | Scientific background and explanation of rationale                                                                                                                                          | 5                     |
|                                  | 2b      | Specific objectives or hypotheses                                                                                                                                                           | 7                     |
| <b>Methods</b>                   |         |                                                                                                                                                                                             |                       |
| Trial design                     | 3a      | Description of trial design (such as parallel, factorial) including allocation ratio                                                                                                        | 7                     |
|                                  | 3b      | Important changes to methods after trial commencement (such as eligibility criteria), with reasons                                                                                          | n/a                   |
| Participants                     | 4a      | Eligibility criteria for participants                                                                                                                                                       | 8                     |
|                                  | 4b      | Settings and locations where the data were collected                                                                                                                                        | 8                     |
| Interventions                    | 5       | The interventions for each group with sufficient details to allow replication, including how and when they were actually administered                                                       | 8/9/10/11<br>Figure 2 |
| Outcomes                         | 6a      | Completely defined pre-specified primary and secondary outcome measures, including how and when they were assessed                                                                          | 11 and 5<br>protocol  |
|                                  | 6b      | Any changes to trial outcomes after the trial commenced, with reasons                                                                                                                       | n/a                   |
| Sample size                      | 7a      | How sample size was determined                                                                                                                                                              | 13                    |
|                                  | 7b      | When applicable, explanation of any interim analyses and stopping guidelines                                                                                                                | n/a                   |
| <b>Randomisation:</b>            |         |                                                                                                                                                                                             |                       |
| Sequence generation              | 8a      | Method used to generate the random allocation sequence                                                                                                                                      | 14                    |
|                                  | 8b      | Type of randomisation; details of any restriction (such as blocking and block size)                                                                                                         | 14                    |
| Allocation concealment mechanism | 9       | Mechanism used to implement the random allocation sequence (such as sequentially numbered containers), describing any steps taken to conceal the sequence until interventions were assigned | 14                    |
| Implementation                   | 10      | Who generated the random allocation sequence, who enrolled participants, and who assigned participants to interventions                                                                     | 2/3 protocol          |
| Blinding                         | 11a     | If done, who was blinded after assignment to interventions (for example, participants, care providers, those                                                                                | 14, 15                |

|                                                      |     |                                                                                                                                                   |                                   |
|------------------------------------------------------|-----|---------------------------------------------------------------------------------------------------------------------------------------------------|-----------------------------------|
|                                                      |     | assessing outcomes) and how                                                                                                                       |                                   |
|                                                      | 11b | If relevant, description of the similarity of interventions                                                                                       | 8/9/10/11                         |
| Statistical methods                                  | 12a | Statistical methods used to compare groups for primary and secondary outcomes                                                                     | 15                                |
|                                                      | 12b | Methods for additional analyses, such as subgroup analyses and adjusted analyses                                                                  | n/a                               |
| <b>Results</b>                                       |     |                                                                                                                                                   |                                   |
| Participant flow (a diagram is strongly recommended) | 13a | For each group, the numbers of participants who were randomly assigned, received intended treatment, and were analysed for the primary outcome    | Figure 1                          |
|                                                      | 13b | For each group, losses and exclusions after randomisation, together with reasons                                                                  | Figure 1                          |
| Recruitment                                          | 14a | Dates defining the periods of recruitment and follow-up                                                                                           | 8                                 |
|                                                      | 14b | Why the trial ended or was stopped                                                                                                                | n/a                               |
| Baseline data                                        | 15  | A table showing baseline demographic and clinical characteristics for each group                                                                  | Table 1                           |
| Numbers analysed                                     | 16  | For each group, number of participants (denominator) included in each analysis and whether the analysis was by original assigned groups           | Figure 1                          |
| Outcomes and estimation                              | 17a | For each primary and secondary outcome, results for each group, and the estimated effect size and its precision (such as 95% confidence interval) | 15,16                             |
|                                                      | 17b | For binary outcomes, presentation of both absolute and relative effect sizes is recommended                                                       | 15,16                             |
| Ancillary analyses                                   | 18  | Results of any other analyses performed, including subgroup analyses and adjusted analyses, distinguishing pre-specified from exploratory         | n/a                               |
| Harms                                                | 19  | All important harms or unintended effects in each group (for specific guidance see CONSORT for harms)                                             | n/a                               |
| <b>Discussion</b>                                    |     |                                                                                                                                                   |                                   |
| Limitations                                          | 20  | Trial limitations, addressing sources of potential bias, imprecision, and, if relevant, multiplicity of analyses                                  | 15/16                             |
| Generalisability                                     | 21  | Generalisability (external validity, applicability) of the trial findings                                                                         | 19                                |
| Interpretation                                       | 22  | Interpretation consistent with results, balancing benefits and harms, and considering other relevant evidence                                     | 19                                |
| <b>Other information</b>                             |     |                                                                                                                                                   |                                   |
| Registration                                         | 23  | Registration number and name of trial registry                                                                                                    | ClinicalTrials.gov<br>NCT02886754 |
| Protocol                                             | 24  | Where the full trial protocol can be accessed, if available                                                                                       | Attached, Clinical trials.gov,    |

1  
2  
3  
4  
5  
6  
7  
8  
9  
10  
11  
12  
13  
14  
15  
16  
17  
18  
19  
20  
21  
22  
23  
24  
25  
26  
27  
28  
29  
30  
31  
32  
33  
34  
35  
36  
37  
38  
39  
40  
41  
42  
43  
44  
45  
46  
47

and attached  
none

Funding 25 Sources of funding and other support (such as supply of drugs), role of funders

\*We strongly recommend reading this statement in conjunction with the CONSORT 2010 Explanation and Elaboration for important clarifications on all the items. If relevant, we also recommend reading CONSORT extensions for cluster randomised trials, non-inferiority and equivalence trials, non-pharmacological treatments, herbal interventions, and pragmatic trials. Additional extensions are forthcoming: for those and for up to date references relevant to this checklist, see [www.consort-statement.org](http://www.consort-statement.org).

For peer review only

# BMJ Open

## The effect of a proficiency-based progression simulation programme on clinical communication for the deteriorating patient: A randomised controlled trial.

|                                 |                                                                                                                                                                                                                                                                                                                                                                                                                                                                                                                         |
|---------------------------------|-------------------------------------------------------------------------------------------------------------------------------------------------------------------------------------------------------------------------------------------------------------------------------------------------------------------------------------------------------------------------------------------------------------------------------------------------------------------------------------------------------------------------|
| Journal:                        | <i>BMJ Open</i>                                                                                                                                                                                                                                                                                                                                                                                                                                                                                                         |
| Manuscript ID                   | bmjopen-2018-025992.R1                                                                                                                                                                                                                                                                                                                                                                                                                                                                                                  |
| Article Type:                   | Research                                                                                                                                                                                                                                                                                                                                                                                                                                                                                                                |
| Date Submitted by the Author:   | 25-Feb-2019                                                                                                                                                                                                                                                                                                                                                                                                                                                                                                             |
| Complete List of Authors:       | Breen, Dorothy; Cork University Hospital Group, Department of Anaesthesia and Intensive Care<br>O'Brien, Sinead; University College Cork National University of Ireland, School of Nursing and Midwifery<br>McCarthy, Nora; University College Cork National University of Ireland, Medical Education Unit, School of Medicine<br>Gallagher, Anthony; Ulster University , Faculty of Life and Health Sciences<br>Walshe, Nuala; University College Cork National University of Ireland, School of Nursing and Midwifery |
| <b>Primary Subject Heading</b>: | Communication                                                                                                                                                                                                                                                                                                                                                                                                                                                                                                           |
| Secondary Subject Heading:      | Communication, Medical education and training, Nursing                                                                                                                                                                                                                                                                                                                                                                                                                                                                  |
| Keywords:                       | Handover, Simulation, Safety, Communication, Assessment, Performance                                                                                                                                                                                                                                                                                                                                                                                                                                                    |
|                                 |                                                                                                                                                                                                                                                                                                                                                                                                                                                                                                                         |

SCHOLARONE™  
Manuscripts

1  
2  
3 The effect of a proficiency-based progression simulation programme  
4  
5  
6 on clinical communication for the deteriorating patient: A  
7  
8  
9 randomised controlled trial.

10  
11  
12  
13  
14 1. Dr Dorothy Breen FFARCSI, FCICM, MD\*, Cork University Hospital  
15  
16 and the ASSERT Centre, University College Cork, Cork, Ireland.

17  
18  
19 2. Sinéad O'Brien RGN, MSC, School of Nursing and Midwifery at  
20  
21  
22 University College Cork, Cork Ireland.

23  
24  
25 3. Dr Nora McCarthy MICGP, MMH , School of Medicine, University  
26  
27  
28 College Cork, Cork Ireland

29  
30  
31 4. Prof Anthony G Gallagher PhD, DSc, Faculty of Life and Health  
32  
33  
34 Sciences, Ulster University, Londonderry, United Kingdom.

35  
36  
37 5. Nuala Walshe RN, MTLHE, MN, School of Nursing and Midwifery,  
38  
39  
40 University College Cork, Cork, Ireland

41  
42 \*Corresponding author Dr Dorothy Breen, [dorothy.breen@hse.ie](mailto:dorothy.breen@hse.ie),

43  
44  
45 *Department of Intensive Care, Cork University Hospital, Wilton, Cork,*  
46  
47 *Ireland. Tel 00353-21-4546434, Fax 00353-21 4922135*

48  
49  
50  
51  
52 Word Count: 3799 including abstract

53  
54  
55 Key words: Medical Education and Training, Handover, Simulation,  
56  
57  
58 Safety.

1  
2  
3  
4  
5  
6  
7  
8  
9  
10  
11  
12  
13  
14  
15  
16  
17  
18  
19  
20  
21  
22  
23  
24  
25  
26  
27  
28  
29  
30  
31  
32  
33  
34  
35  
36  
37  
38  
39  
40  
41  
42  
43  
44  
45  
46  
47  
48  
49  
50  
51  
52  
53  
54  
55  
56  
57  
58  
59  
60

For peer review only



1  
2  
3 The effect of a proficiency-based progression simulation programme  
4  
5  
6 on clinical communication for the deteriorating patient: A  
7  
8 randomised controlled trial.  
9  
10  
11  
12  
13

14 **ABSTRACT**

15  
16  
17 **Objective**

18  
19 To determine the effectiveness of a proficiency-based progression  
20 training approach to clinical communication in the context of a  
21 clinically deteriorating patient.  
22  
23  
24  
25  
26

27  
28 **Design**

29  
30 A randomised controlled trial with three parallel arms.  
31  
32

33  
34 **Setting**

35  
36 A university setting in Ireland  
37  
38

39  
40 **Participants**

41 45 third year nursing and 45 final year medical undergraduates  
42 scheduled to undertake interdisciplinary National Early Warning  
43 Score (NEWS) training over a three day period in September 2016.  
44  
45  
46  
47  
48

49  
50 **Interventions**

51  
52 Participants were prospectively randomised to one of three groups  
53 before undertaking a performance assessment of the ISBAR  
54 communication tool (Identification, Situation, Background,  
55  
56  
57  
58  
59  
60

1  
2  
3 Assessment, Recommendation) relevant to a deteriorating patient in  
4  
5  
6 a high fidelity simulation facility. The groups were as follows (i) E;  
7  
8  
9 the Irish Health Service national NEWS e-learning programme only,  
10  
11  
12 (ii) E+S; the national e-learning programme plus standard  
13  
14  
15 simulation, and (iii) E+PBP; the national e-learning programme plus  
16  
17  
18 proficiency-based progression simulation.

### 19 20 Main outcome measures

21  
22 The primary outcome was the proportion in each group reaching a  
23  
24  
25 pre-defined proficiency benchmark comprising a series of pre-  
26  
27  
28 defined steps, errors and critical errors during the performance of a  
29  
30  
31 standardised, high fidelity simulation assessment case which was  
32  
33  
34 recorded and independently scored by two independent blinded  
35  
36  
37 assessors.

### 38 39 Results

40  
41 6.9% (2/29) of the E group and 13% (3/23) of the E+S group  
42  
43  
44 demonstrated proficiency in comparison to 60% (15/25) of the  
45  
46  
47 E+PBP group. The difference between the E and the E+S groups was  
48  
49  
50 not statistically significant (Chi-Square = 0.55, 99%, CI =0.63-0.66, p=  
51  
52  
53 0.63) but was significant for the difference between the E and the E  
54  
55  
56 +PBP groups (Chi-Square = 22.25, CI=0.00-0.00, p < 0.000) and  
57  
58  
59  
60

1  
2  
3 between the E+S and the E+PBP groups (Chi-Square = 11.04,  
4  
5  
6 CI=0.00-0.00, p = 0.001).  
7

## 8 9 **Conclusions**

10  
11 Proficiency-based progression is a more effective way to teach  
12  
13 clinical communication in the context of the deteriorating patient  
14  
15 than e-learning either alone or in combination with standard  
16  
17 simulation.  
18  
19  
20

## 21 22 **Trial Registration**

23  
24  
25 ClinicalTrials.gov Identifier: NCT02886754  
26  
27

## 28 29 **STRENGTHS AND LIMITATIONS OF THE STUDY**

- 30  
31  
32  
33  
34  
35  
36  
37  
38  
39  
40  
41  
42  
43  
44  
45  
46  
47  
48  
49  
50  
51  
52  
53
- This is the first randomised controlled trial of a proficiency-based progression educational intervention for a non-technical skill.
  - The performance outcomes are robust objective measurements which do not rely on subjective assessments or learner perceptions.
  - Limitations are the single centre design and the future need for the impact of proficiency-based progression programmes on patient outcomes.

54  
55  
56  
57  
58  
59  
60

Funding Statement: This research received no specific grant from any funding agency in the public, commercial or not-for-profit sectors.

1  
2  
3  
4  
5  
6 Competing interests: All authors have completed the ICMJE uniform  
7  
8 disclosure form at [www.icmje.org/coi\\_disclosure.pdf](http://www.icmje.org/coi_disclosure.pdf) and declare: no  
9  
10 support from any organisation for the submitted work, no financial  
11  
12 relationships with any organisations that might have an interest in  
13  
14 the submitted work in the previous three years; no other  
15  
16 relationships or activities that could appear to have influenced the  
17  
18 submitted work.  
19  
20  
21  
22  
23  
24  
25  
26  
27

28 Ethical Approval: Institutional review board approval was obtained.  
29  
30 Informed written consent was obtained from all participants.  
31  
32  
33  
34  
35

36 Transparency: The lead author affirms that the manuscript is an  
37  
38 honest, accurate and transparent account of the study being  
39  
40 reported; that no important aspects have been omitted; and that any  
41  
42 discrepancies from the study as planned have been explained.  
43  
44  
45  
46  
47  
48  
49

50 The Corresponding Author has the right to grant on behalf of all  
51  
52 authors and does grant on behalf of all authors, [a worldwide](#)  
53  
54 [licence](#) to the Publishers and its licensees in perpetuity, in all forms,  
55  
56 formats and media (whether known now or created in the future), to  
57  
58  
59  
60

1  
2  
3 i) publish, reproduce, distribute, display and store the Contribution,  
4  
5  
6 ii) translate the Contribution into other languages, create  
7  
8 adaptations, reprints, include within collections and create  
9  
10 summaries, extracts and/or, abstracts of the Contribution, iii) create  
11  
12 any other derivative work(s) based on the Contribution, iv) to exploit  
13  
14 all subsidiary rights in the Contribution, v) the inclusion of electronic  
15  
16 links from the Contribution to third party material where-ever it may  
17  
18 be located; and, vi) licence any third party to do any or all of the  
19  
20 above.  
21  
22  
23  
24  
25  
26  
27

28 All authors listed below met ICMJE criteria for contributorship as  
29  
30 outlined below.  
31  
32

33 Dr Dorothy Breen  
34  
35

36 1. Contributed substantially to the conception and design of the work;  
37  
38 the acquisition, of the data for the work; AND  
39  
40

41 2. Drafting the work, revising the work critically for important  
42  
43 intellectual content AND  
44  
45

46 3. Drafting the final version to be published; AND  
47  
48

49 4. Agrees to be accountable for all aspects of the work in ensuring  
50  
51 that questions related to the accuracy or integrity of any part of the  
52  
53 work are appropriately investigated and resolved.  
54  
55  
56

57 Sinead O'Brien  
58  
59  
60

- 1
- 2
- 3 1. Contributed substantially to the conception and design of the
- 4
- 5 work; and the acquisition, of data for the work; AND
- 6
- 7
- 8 2.Revising the work critically for important intellectual content; AND
- 9
- 10
- 11 3. Final approval of the version to be published; AND
- 12
- 13
- 14 4. Agrees to be accountable for all aspects of the work in ensuring
- 15
- 16 that questions related to the accuracy or integrity of any part of the
- 17
- 18 work are appropriately investigated and resolved.
- 19
- 20
- 21

22 Dr Nora McCarthy

- 23
- 24
- 25 1. Contributed substantially to the conception and design of the
- 26
- 27 work; and the acquisition, AND
- 28
- 29
- 30 3. Revising the work critically for important intellectual content;
- 31
- 32 AND
- 33
- 34
- 35
- 36 4 Final approval of the version to be published; AND
- 37
- 38
- 39 5. Agrees to be accountable for all aspects of the work in ensuring
- 40
- 41 that questions related to the accuracy or integrity of any part of the
- 42
- 43 work are appropriately investigated and resolved.
- 44
- 45
- 46

47 Prof Anthony G Gallagher

- 48
- 49
- 50 1. Contributed substantially to the conception and design of the
- 51
- 52 work; and the analysis and interpretation of data for the work; AND
- 53
- 54
- 55 2. Revising the work critically for important intellectual content;
- 56
- 57 AND
- 58
- 59
- 60

1  
2  
3 3. Final approval of the version to be published; AND

4  
5  
6 Agreement to be accountable for all aspects of the work in 4. Agrees  
7  
8 to ensure that questions related to the accuracy or integrity of any  
9  
10 part of the work are appropriately investigated and resolved.  
11  
12

13  
14 Nuala Walshe

15  
16  
17 1. Contributed substantially to the conception and design of the  
18  
19 work; and the acquisition, of data for the work; AND  
20  
21

22 2. Revising the work critically for important intellectual content;  
23  
24

25 AND  
26

27  
28 3. Final approval of the version to be published; AND  
29

30  
31 4. Agrees to be accountable for all aspects of the work in ensuring  
32  
33 that questions related to the accuracy or integrity of any part of the  
34  
35 work are appropriately investigated and resolved.  
36  
37

38  
39  
40  
41 Data Sharing: Deidentified individual participant data that underlie  
42  
43 the results published in this article as well as study protocol,  
44  
45 statistical analysis plan and analytical code will be made available on  
46  
47 request beginning three months and ending 5 years after publication  
48  
49 to researchers who provide a methodologically sound proposal.  
50  
51 Please direct requests to the corresponding author. Data accessors  
52  
53 will need to sign a data access agreement. The data from the pilot  
54  
55  
56  
57  
58  
59  
60

1  
2  
3 study and from this study in relation to learner perceptions is  
4  
5  
6 undergoing analysis and will be available following publication.  
7  
8  
9

## 10 11 **Introduction**

12  
13  
14  
15 Simulation-based training is being increasingly deployed for both  
16  
17 technical and non-technical skill acquisition in healthcare with the  
18  
19 aim of reducing medical error and patient harm. There is a need for  
20  
21 an evidence-based approach to such training to ensure that the  
22  
23 resources utilised can reliably deliver a quantifiable improved skill  
24  
25 set rather than just an enhanced educational experience. Proficiency-  
26  
27 based progression (PBP) training is a form of outcomes-based  
28  
29 training that involves training individuals to a "proficiency  
30  
31 benchmark." Trainees undertake deliberate (rather than repeated)  
32  
33 practice to demonstrate a pre-defined set of metrics. The proficiency  
34  
35 benchmark is set as the mean performance of clinicians who  
36  
37 undertake the procedure regularly in clinical practice. It has been  
38  
39 shown to improve the performance of individuals undertaking  
40  
41 technical procedures <sup>1, 2, 3, 4, 5, 6, 7</sup>. Metrics are operationally defined to  
42  
43 facilitate objective scoring. For example in the study by Cates et al  
44  
45 demonstrating improved performance of carotid angiography, pre-  
46  
47 defined metric errors include "number of diagnostic catheters used  
48  
49  
50  
51  
52  
53  
54  
55  
56  
57  
58  
59  
60



1  
2  
3 to obtain diagnostic pictures” and “catheter advancing without a  
4  
5  
6 guide-wire in front of it”<sup>6</sup>. Despite these results, PBP methodology  
7  
8  
9 has not previously been applied to simulation-based training for non-  
10  
11  
12 technical skills yet communication failures are a significant source of  
13  
14  
15 medical error and preventable adverse events equal if not greater  
16  
17 than errors due to lack of technical skill <sup>8, 9, 10</sup>. Escalation of care for  
18  
19  
20 an acutely deteriorating patient demands the most efficient, concise  
21  
22  
23 and accurate flow of information amongst healthcare workers of  
24  
25  
26 different disciplines for the best outcome to be achieved.

27  
28  
29 Early Warning Scores facilitate early detection of deterioration by  
30  
31  
32 categorising a patient’s severity of illness and prompting escalation  
33  
34  
35 of care at specific trigger points utilising a structured communication  
36  
37  
38 tool such as ISBAR (Identification, Situation, Background,  
39  
40  
41 Assessment, Recommendation). This enables a more timely response  
42  
43  
44 using a common language <sup>11</sup>. Ireland was one of the first countries to  
45  
46  
47 agree and implement a standardised Early Warning Score (The  
48  
49  
50 National Early Warning Score, NEWS) across the entire acute hospital  
51  
52  
53 sector. NEWS utilises the ISBAR tool as the recommended structured  
54  
55  
56 communication tool for the acutely deteriorating patient <sup>12, 13</sup>. The  
57  
58  
59 National Early Warning Score (NEWS) e-learning education  
60  
programme is recommended as the national interdisciplinary

1  
2  
3 education programme for all healthcare professionals working in  
4  
5  
6 acute services. The programme teaches ISBAR as the standardised  
7  
8  
9 tool to escalate care in the context of the acutely deteriorating  
10  
11  
12 patient.

13  
14  
15 The primary aim of this study was to determine if the addition of a  
16  
17  
18 proficiency-based progression simulation training programme to the  
19  
20  
21 national NEWS e-learning module results in better performance of  
22  
23  
24 clinical communication of a deteriorating patient than either the e-  
25  
26  
27 learning module alone or in combination with standard simulation.  
28  
29  
30

## 31 **Methods**

### 32 **Study design**

33  
34  
35 A randomised controlled trial with three parallel arms.  
36  
37

### 38 **Participants**

39  
40  
41 Eligible participants were 109 third year nursing and 201 final year  
42  
43  
44 medical students who were scheduled to undertake interdisciplinary  
45  
46  
47 National Early Warning Score training in September 2016 as part of  
48  
49  
50 their undergraduate curriculum. This comprised the entire  
51  
52  
53 undergraduate nursing and medical classes except for 31 medical  
54  
55  
56 students who were scheduled to undertake this training at a later  
57  
58  
59 time in the curriculum (figure 1).  
60

## Interventions

All 3<sup>rd</sup> year nursing and final year medical students were emailed prior to training and instructed to undertake the National Early Warning Score e-learning programme. Written informed consent was obtained from all participants. On the day of training, participants were required to submit a certificate of successful completion of the e-learning programme. A 15-minute lecture on the ISBAR tool was delivered before participants undertook training as per their allocated groups. Students were not notified as to which study group they were allocated. The study flow is outlined in figure 2.

The three training groups were as follows:

**(i) e-learning only group (E).** Participants in this group proceeded immediately following the 15-minute lecture to the high fidelity suite for performance assessment. After outcome assessment was complete, participants undertook simulation training similar to the E+S group as outlined below in order to ensure that all students were afforded the same training opportunity from a curriculum perspective.

**(ii) e-learning plus standard simulation group (E+S).** Participants worked in pairs of a medical student and nursing student. If a

1  
2  
3 participant did not have a partner, then a non-study peer student was  
4  
5  
6 asked to pair with that individual for the purposes of training. Data  
7  
8  
9 from the non-study student was not included in the analysis.

10  
11 Training consisted of a series of simulated phone calls using four  
12  
13  
14 standardised paper cases for each discipline. Case materials included  
15  
16  
17 case notes, NEWS charts, and a blank ISBAR template indicating the  
18  
19  
20 categories and type of information that should be communicated.  
21  
22  
23 Each scenario had a deteriorating patient event that necessitated an  
24  
25  
26 ISBAR telephone communication. Participants alternated between  
27  
28  
29 making and receiving simulated phone calls. A standardised script  
30  
31  
32 was given to the recipient. Two facilitators conducted the simulation  
33  
34  
35 training. Both facilitators were experienced clinicians and educators  
36  
37  
38 who had previously undergone the “Train the Trainer NEWS  
39  
40  
41 programme” and regularly facilitate NEWS training and healthcare  
42  
43  
44 simulation. The facilitators offered support and feedback in line with  
45  
46  
47 standard NEWS training by listening to simulated phone calls and  
48  
49  
50 offering feedback on the ISBAR framework and by answering  
51  
52  
53 questions as they arose. Participants were required to work through  
54  
55  
56 all four cases with their partner. Towards the end of the training  
57  
58  
59 session the participants presented to the facilitator to repeat a  
60  
simulated phone call for either case 3 or 4. The training session was

1  
2  
3 3.5 hours in duration, participants were required to stay until the end  
4  
5  
6 of the training regardless of progress. If an individual had completed  
7  
8  
9 all the cases, they were asked to assist by continuing to be the  
10  
11 recipient of phone calls for their partner or by continuing to practice  
12  
13 by repeating the cases if required.  
14  
15

16  
17 **(iii) e-learning plus proficiency-based progression simulation**  
18  
19 **group (E+PBP).** Participants underwent a training programme of  
20  
21 the same structure, duration (3.5 hours), content and facilitator:  
22  
23 student ratio as the E+S group. The same two facilitators facilitated  
24  
25 both the E+S and E+PBP training. However in the E+PBP group,  
26  
27 partners scored each other's phone calls during training against a  
28  
29 series of pre-defined metrics (quantified as steps, errors and critical  
30  
31 errors for each case) on a score sheet to ascertain if the proficiency  
32  
33 benchmark for that case was reached. Partners shared the results of  
34  
35 the metrics and proficiency scores with each other as feedback at the  
36  
37 end of each simulated phone call. If proficiency was not achieved the  
38  
39 case was repeated before progressing to the next case. Participants  
40  
41 were required to reach proficiency on all four cases with their  
42  
43 partner before performing case 3 or 4 with the facilitator and  
44  
45 demonstrating proficiency again. If proficiency was not achieved with  
46  
47 the facilitator then the participant returned to repeat cases with their  
48  
49  
50  
51  
52  
53  
54  
55  
56  
57  
58  
59  
60

1  
2  
3 partner and present for reassessment to the facilitator until  
4  
5  
6 proficiency was demonstrated. The training session was 3.5 hours in  
7  
8  
9 duration, participants were required to stay until the end of the  
10  
11 training regardless of progress. If an individual had completed all the  
12  
13 cases, they were asked to assist by continuing to be the recipient of  
14  
15 phone calls for their partner or by continuing to practice by repeating  
16  
17 the cases if required.  
18  
19  
20  
21  
22  
23  
24  
25

## 26 **Outcomes**

27  
28  
29  
30 The primary outcome was the ability to reach the proficiency  
31  
32 benchmark on the standardised high-fidelity simulation assessment  
33  
34 case. The secondary outcomes were the number of successfully  
35  
36 completed steps, errors and critical errors performed by each group.  
37  
38  
39  
40  
41

42 Performance metrics were developed for the training cases and for  
43  
44 the high fidelity simulation assessment case as part of a pilot study in  
45  
46 the previous year. Each case presented a different but commonly  
47  
48 encountered clinical scenario of an acutely deteriorating patient. As  
49  
50 an example, the outline of the nursing component of the high fidelity  
51  
52 simulation assessment case is shown in figure 3.  
53  
54  
55  
56  
57  
58  
59  
60

1  
2  
3 The metrics were derived for each of the training and assessment  
4 cases according to the 5 components of the ISBAR tool and were  
5 specific to each case.  
6  
7  
8  
9

10  
11  
12 The performance metrics were validated through a modified Delphi  
13 expert panel consisting of 9 senior nurses and 8 medical staff who  
14 regularly facilitate NEWS/ISBAR communication training. Delphi  
15 panel members reviewed the performance metric for each of the  
16 simulation cases and the high fidelity performance outcome case and  
17 metric units were included, excluded or modified by consensus. Each  
18 metric unit was then classified as a step, error or critical error by  
19 consensus. The majority of metrics were common to both medicine  
20 and nursing. The number of metrics per case ranged from 24-26.  
21  
22  
23  
24  
25  
26  
27  
28  
29  
30  
31  
32  
33  
34  
35

36  
37 The proficiency benchmark was set as the mean performance of  
38 qualified personnel from the respective disciplines on each case. Nine  
39 nursing and five medically qualified practitioners (who regularly  
40 escalate care in the acute healthcare setting and with a mean years of  
41 experience=3 years) underwent the high fidelity simulation case. The  
42 proficiency benchmark for the assessment case was set as the mean  
43 performance for each discipline as scored by two independent  
44 assessors using the pre-defined metrics. An extract from the metric  
45  
46  
47  
48  
49  
50  
51  
52  
53  
54  
55  
56  
57  
58  
59  
60

1  
2  
3 scoring sheet and proficiency benchmark for the high fidelity  
4 simulation assessment case is shown in figure 4.  
5  
6

7  
8 Digital recordings of each participant's performance of the  
9 standardised case in the high fidelity assessment suite were  
10 reviewed and scored by two independent assessors (experienced  
11 acute care nurses) using the pre-defined metrics and proficiency  
12 benchmark.  
13  
14

15  
16 The assessors underwent training on scoring the material using 10  
17 recordings of the same case obtained from non-study participants.  
18 Assessment of the digital recordings was undertaken within 2  
19 months of study participation. An inter-rater reliability of > 85% was  
20 achieved prior to commencing scoring study material. The assessors  
21 were not part of the investigator group, were blinded to the study  
22 group allocations and had no prior knowledge of any of the  
23 participants.  
24  
25  
26  
27  
28  
29  
30  
31  
32  
33  
34  
35  
36  
37  
38  
39  
40  
41  
42  
43  
44  
45  
46

### 47 **Sample size**

48  
49 Power calculation: the numbers needed in each arm was based on  
50 transfer of training (the degree to which trainees transfer the  
51 knowledge and skills acquired from one learning situation to another  
52 setting) observed in previous studies of proficiency based  
53  
54  
55  
56  
57  
58  
59  
60



1  
2  
3 progression simulation in surgery and cardiology, where transfer of  
4  
5 training rates of 42-69% have been observed <sup>1, 2, 3, 4, 5, 6</sup>. In a pilot for  
6  
7 the current study on 133 medical and nursing students in the  
8  
9 previous academic year, the transfer of training rate was observed to  
10  
11 be 16% for the proficiency based training group and 3% for the  
12  
13 standard simulation group. The pilot however was constrained by  
14  
15 the existing curriculum, which only allowed for 90 minutes training  
16  
17 time once the e-learning programme was complete. In the current  
18  
19 study a longer training time (3.5 hours) and a more rigorous  
20  
21 structure was facilitated. We therefore expected to observe an  
22  
23 increase in transfer of training to >40% based on a 3 fold increase in  
24  
25 objective, blind, assessment of proficiency when compared to the  
26  
27 control group (i.e. 9% for the E group vs. 49% for the E+PBP group).  
28  
29 A two -tailed test, with n=20 trainees in each group with an alpha of  
30  
31 5% (which corresponds to a 95% confidence interval) would yield a  
32  
33 statistical power of 89.9. Therefore 30 (15 medical and 15 nursing  
34  
35 students) were randomised to each group to allow for drop out rates  
36  
37 observed in the pilot due to students rescheduling to non-study  
38  
39 training dates as a result of conflicting demands of their curriculum.  
40  
41  
42  
43  
44  
45  
46  
47  
48  
49  
50  
51  
52  
53  
54

### 55 **Randomisation and blinding**

56  
57  
58  
59  
60

1  
2  
3 A de-identified numbered list of nursing and medical student  
4 numbers was obtained from the School of Nursing and Midwifery and  
5  
6 the School of Medicine. The lists comprised 109 third year nursing  
7  
8 and 201 final year medical students scheduled to complete an  
9  
10 interdisciplinary ISBAR training programme as part of the University  
11  
12 undergraduate curriculum in September 2016. Randomisation was  
13  
14 stratified by discipline and was conducted using a computer-  
15  
16 generated programme (GraphPad QuickCals software package,  
17  
18 [www.graphpad.com/quickcalcs/](http://www.graphpad.com/quickcalcs/)) as a two-stage process (figure 1).  
19  
20  
21  
22  
23  
24  
25  
26

27  
28 Firstly n=45 nursing and n=45 medical students were randomly  
29  
30 selected using the programme. These 90 students were then  
31  
32 randomly allocated by discipline using the same computer  
33  
34 programme to one of the three training groups: E, E+S, and E+PBP.  
35  
36 Subjects were excluded from the study if: (i) a certificate of  
37  
38 successful completion (within the previous 4 weeks) of the National  
39  
40 Early Warning Score (NEWS) e-learning education programme was  
41  
42 not presented on the day of training, (ii) lack of consent.  
43  
44  
45  
46  
47  
48  
49  
50  
51

## 52 **Statistical analysis**

53  
54  
55 Statistical Analysis was performed with SPSS 22 (Armonk, New  
56  
57 York). The Kruskal-Wallis test was used to determine if there was a  
58  
59  
60

1  
2  
3 statistical difference between groups in relation to the primary end  
4  
5  
6 point (the numbers reaching proficiency) and the secondary end  
7  
8  
9 points (the number of completed steps, errors and critical errors).  
10  
11 The relationship of the three training programmes on proficiency  
12  
13  
14 was explored using logistic regression analysis.  
15  
16

## 17 Patient and Public Involvement

18  
19 Patients were not involved in the design or conduct of the study.  
20  
21

## 22 Results

23  
24 Baseline characteristics with respect to age, gender, discipline,  
25  
26 nationality and first language of the participants in each group are  
27  
28 shown in table 1.  
29  
30  
31  
32  
33  
34  
35  
36  
37  
38

39 Table 1

| Study Group           |                   | E <sup>a</sup> | E+S <sup>b</sup> | E+PBP <sup>c</sup> | Total      | prob. level <sup>#</sup> |
|-----------------------|-------------------|----------------|------------------|--------------------|------------|--------------------------|
|                       |                   | n=30           | n=30             | n=30               | n=90       |                          |
| <b>Discipline</b>     | Nursing (%)       | 15 (50.0%)     | 15 (50.0%)       | 15 (50.0%)         | 45 (50.0%) |                          |
|                       | Medicine (%)      | 15 (50.0%)     | 15 (50.0%)       | 15 (50.0%)         | 45 (50.0%) |                          |
| <b>Age Group</b>      | 18-23 years (%)   | 21 (70.0%)     | 19 (63.3%)       | 20 (66.7%)         | 60 (66.7%) | p = 0.853                |
|                       | 24-29 years (%)   | 7 (23.3%)      | 8 (26.7%)        | 9 (30.0%)          | 24 (26.7%) |                          |
|                       | >30 years (%)     | 2 (6.7%)       | 3 (10.0%)        | 1 (3.3%)           | 6 (6.7%)   |                          |
| <b>Gender</b>         | Male (%)          | 6 (20.0%)      | 5 (16.7%)        | 6 (20.0%)          | 17 (18.9%) | p = 0.919                |
|                       | Female (%)        | 24 (80.0%)     | 22 (83.3%)       | 24 (80.0%)         | 73 (81.1%) |                          |
| <b>Nationality</b>    | Irish (%)         | 22 (73.3%)     | 24 (80.0%)       | 21 (70.0%)         | 67 (74.4%) | p = 0.664                |
|                       | Non-Irish (%)     | 8 (26.7%)      | 6 (20.0%)        | 9 (30.0%)          | 23 (25.6%) |                          |
| <b>First Language</b> | English (%)       | 25 (83.3%)     | 22 (73.3%)       | 19 (63.3%)         | 66 (73.3%) | p = 0.223                |
|                       | Other (%)         | 5 (16.7%)      | 4 (13.3%)        | 7 (23.3%)          | 16 (17.8%) |                          |
|                       | Not available (%) | -              | 4 (13.3%)        | 4 (13.3%)          | 8 (8.9%)   |                          |

1  
2  
3  
4  
5  
6  
7  
8  
9  
10  
11  
12  
13  
14  
15  
16  
17  
18  
19  
20  
21  
22  
23  
24  
25  
26  
27  
28  
29  
30  
31  
32  
33  
34  
35  
36  
37  
38  
39  
40  
41  
42  
43  
44  
45  
46  
47  
48  
49  
50  
51  
52  
53  
54  
55  
56  
57  
58  
59  
60

Figure 5 shows percentages of participants in each group who demonstrated the proficiency benchmark following assessment in the high fidelity simulation suite. At the end of training, 6.9% (2/29) of the e-learning only (E) group and 13 % (3/23) of the standard simulation (E+S) group demonstrated proficiency. In comparison 60% (15/25) of proficiency-based progression simulation (E+PBP) group were proficient. The difference between the E group and the E+S group was not statistically significant (Chi-Square = 0.55, 99%, CI =0.63-0.66, p= 0.63) but was significant for the difference between E group and the E +PBP group (Chi-Square = 22.25, CI=0.00-0.00, p < 0.000) and between the S group and the E+PBP group (Chi-Square = 11.04, CI=0.00-0.00, p = 0.001).

On logistic regression analysis (figure 6) it was found that in comparison to the E group, the E+S group were 2 times as likely to demonstrate proficiency (Ext (B) =2.04, 95% CI=0.31-13.28, p=0.46). This difference was in the direction of improved performance but the effect was not statistically significant probably because of the sample size used in this study. In contrast the PBP trained group were more than 20 times as likely to demonstrate proficiency in comparison to

1  
2  
3 the E trained group and the difference was statistically significant  
4  
5  
6 (Ext (B) =20.25, 95% CI=3.91-105,  $p<0.000$ ).  
7

8  
9 The E+PBP group completed significantly more steps, mean 8.5 (1.7)  
10  
11 than either the E, mean 5.8 (1.6),  $p<0.000$  or E+S groups, mean 6.3  
12  
13 (2.1),  $p<0.000$  group. Similarly, combined errors and critical errors  
14  
15 were significantly less in the E+PBP, mean 3.7 (1.6) than either the E,  
16  
17 mean 5.9 (2.1),  $p<0.000$  or the E+S groups, mean 5.2 (1.5),  $p<0.01$   
18  
19 group. Inter-rater reliability of the two assessors was 97%.  
20  
21  
22  
23  
24  
25

## 26 **Discussion**

27  
28  
29 Our results show that addition of a proficiency-based progression  
30  
31 simulation programme to an e-learning module can deliver a  
32  
33 superior set of skills for ISBAR communication in relation to a  
34  
35 deteriorating patient than an e-learning module either alone or in  
36  
37 combination with standard simulation. Furthermore this benefit is  
38  
39 seen within the same resources i.e. materials, timeframe, and  
40  
41 facilitators as standard simulation. The Irish health service like its  
42  
43 international counterparts has prioritised clinical communication as  
44  
45 a key part of the patient safety agenda <sup>12, 13, 14, 15, 16</sup>. Clinical  
46  
47 communication is now viewed as an essential skill and training is  
48  
49 recommended as mandatory for all health and social care  
50  
51  
52  
53  
54  
55  
56  
57  
58  
59  
60

professionals<sup>13</sup>. All participants were required to produce a recent certificate of successful completion of the e-learning programme but only 6.9% of the group who undertook the e-learning module only demonstrated the proficiency benchmark. The addition of standard simulation did not significantly improve performance with only 13% of the E+S group reaching the benchmark. It could be argued that exposure to metrics-based scoring in the practice cases resulted in better performance in the assessment case for the E+PBP group. However this is precisely the desired effect i.e. that trainees know what skills need to be achieved, practice to achieve them to an objective pre-defined standard and transfer that training to a dynamic scenario. The E+S and E+PBP groups differed in only two respects: (i) practice was “repeated” in the E+S cohort as opposed to “deliberate” in E+PBP cohort i.e. focused on pre-defined metrics and (ii) the E+PBP group was required to reach proficiency benchmarks to progress through simulation cases whereas the E+S group were not. Our results demonstrate that proficiency-based training can achieve skill acquisition rates of the order of 60%, similar to those seen with technical skills using this approach. In a study of similar experimental design, Angelo et al found that there were 56% fewer intraoperative errors and 69% fewer critical errors when compared

1  
2  
3 to traditional training <sup>2</sup>. To our knowledge our study is the first  
4  
5  
6 randomised trial of proficiency-based progression training of a non-  
7  
8  
9 technical skill.

10  
11 The main strength of the study is the use of robust methodology to  
12  
13 determine the effectiveness of an educational intervention on  
14  
15 objectively assessed performance outcomes. The study combines the  
16  
17 rigour of a randomised controlled trial with that of an outcomes  
18  
19 based- training approach (proficiency-based progression) to clinical  
20  
21 communication. A significant body of evidence already exists in  
22  
23 relation to the use of proficiency-based progression for technical skill  
24  
25 acquisition <sup>7, 8, 9, 10, 11, 12, 13</sup>. Our results support the use of proficiency-  
26  
27 based progression training for communication skills also. This study  
28  
29 indicates that the impact of a PBP training methodology appears to  
30  
31 be >40% for non-technical as well as technical skills.  
32  
33  
34  
35  
36  
37  
38  
39  
40

41 Weaknesses of the study include the single centre design and the  
42  
43 application to the undergraduate population only, although the  
44  
45 training programme was designed for qualified nurses and doctors  
46  
47 also. Since the completion of study, the programme has been applied  
48  
49 successfully to both nursing and medical undergraduate programmes  
50  
51 in the university setting and to doctors in training in the hospital  
52  
53 setting. There is a need for further robust evaluation of this  
54  
55  
56  
57  
58  
59  
60

1  
2  
3 application of the programme and extension to other sites and  
4  
5  
6 clinical settings.  
7

8  
9 The study was limited by the restriction on training time. The  
10  
11 duration of simulation training for both E+S and the E+PBP groups  
12  
13 was extended to 3.5 hours from the initial pilot (1.5 hours), but was  
14  
15 still restricted by the existing undergraduate curriculum rather than  
16  
17 that which would ideally be required to train a fundamental skill.  
18  
19 Skills consolidation is an important part of the learning process  
20  
21 particularly for new skills<sup>17</sup>. In the study by Angelo et al.<sup>2</sup> trainees  
22  
23 had a weekend in which to acquire, refine and consolidate their skills  
24  
25 before their proficiency assessment at the end of training. Another  
26  
27 difficulty, which may have impinged on the effectiveness of training,  
28  
29 was the disparity in fidelity between the paper-based training  
30  
31 environment and the assessment undertaken in the high fidelity  
32  
33 simulation environment. This disparity is challenging for those with  
34  
35 limited clinical experience such as the undergraduate population.  
36  
37 Van Sickle et al<sup>3</sup> and Gallagher et al<sup>4</sup> have commented on the  
38  
39 detrimental impact that this disparity can have on proficiency  
40  
41 demonstration by trainees.  
42  
43  
44  
45  
46  
47  
48  
49  
50  
51  
52  
53

54  
55 It is now widely recognised that clinical communication skills  
56  
57 underpin patient safety. Implementation of a training programme in  
58  
59  
60



1  
2  
3 relation to clinical communication has already been shown to reduce  
4  
5  
6 medical error and preventable adverse events <sup>18</sup>. There is a need for  
7  
8  
9 valid, reliable, cost efficient clinical communication training  
10  
11  
12 programmes to address this need and the impact on patient as well  
13  
14  
15 as healthcare provider outcomes.

16  
17 In summary, our study shows that proficiency-based progression is a  
18  
19  
20 more effective way to teach clinical communication for the  
21  
22  
23 deteriorating patient than e-learning either alone or in combination  
24  
25  
26 with standard simulation.

## 30 31 **References**

- 32  
33  
34 1. Gallagher AG, Seymour NE, Jordan-Black JA, Bunting BP, McGlade  
35  
36  
37 K, Satava RM. Prospective, randomised assessment of transfer of  
38  
39  
40 training (ToT) and transfer effectiveness ratio (TER) of virtual reality  
41  
42  
43 simulation training for laparoscopic skill acquisition. *Ann Surg* 2013;  
44  
45  
46 257(6): 1025-31.
- 47  
48 2. Angelo RL, Ryu RK, Pedowitz RA, Beach W, Burns J, Dodds J, Field  
49  
50  
51 L et al. A Proficiency-based progression training curriculum coupled  
52  
53  
54 with a model simulator results in the acquisition of a superior  
55  
56  
57 arthroscopic bankart skill set. *Arthroscopy*. 2015; 31(10): 1854-71.

- 1  
2  
3 3. Van Sickle KR, Ritter EM, Baghai M, Goldenberg AE, Huang  
4  
5  
6 IP, Gallagher AG, Smith CD. Prospective, randomised, double blind  
7  
8  
9 trial of curriculum-based training for intracorporeal suturing and  
10  
11 knot tying. *J Am Coll Surg*. 2008; 207(4): 560-8.  
12
- 13  
14 4. Gallagher AG, O'Sullivan GC. *Fundamentals of surgical simulation;*  
15  
16 *principles & practices*: London; Springer Verlag, 2011.  
17
- 18  
19 5. Seymour NE, Gallagher, AG, Roman SA, O'Brien MK, Bansal VK,  
20  
21 Andersen DK, Satava RM. (2002). Virtual reality training improves  
22  
23 operating room performance: results of a randomised, double-  
24  
25 blinded study. *Annals of Surgery*. 2002; 236(4), 458-463.  
26  
27
- 28  
29 6. Cates CU, Lönn L, Gallagher AG. Prospective, randomised and  
30  
31 blinded comparison of proficiency-based progression full-physics  
32  
33 virtual reality simulator training versus invasive vascular experience  
34  
35 for learning carotid artery angiography by very experienced  
36  
37 operators. *BMJ Simulation and Technology Enhanced Learning*. 2016;  
38  
39 2:1-5.  
40  
41  
42  
43  
44  
45
- 46  
47 7. Ahlberg G, Enochsson L, Gallagher AG, Hedman L et al. Proficiency-  
48  
49 based virtual reality training significantly reduces the error rate for  
50  
51 residents during their first 10 laparoscopic cholecystectomies. *Am J*  
52  
53 *Surg*. 2007; 193: 797-804.  
54  
55  
56  
57  
58  
59  
60

- 1  
2  
3 8. Wilson RM, Runciman WB, Gibberd RW, et al. The quality in  
4  
5 Australian health care study. *Med J Aust.* 1995;163:458 -71.  
6  
7
- 8  
9 9. Bhasale AL, Miller GC, Reid SE, et al. Analysing potential harm in  
10  
11 Australian general practice: an incident-monitoring study. *Med J Aust.*  
12  
13 1998;169:73 -6.  
14  
15
- 16  
17 10. National Confidential Enquiry into Patient Outcome and Death.  
18  
19 Caring to the end? A review of the care of patients who died in  
20  
21 hospital within four days of admission. *NCEPOD*, 2009.  
22  
23
- 24  
25 11. Riesenbergl LA, Leitzsch J, Little BW. Systematic review of handoff  
26  
27 mnemonics literature. *Am J Med Qual.* 2009;24:196-204.  
28  
29
- 30  
31 12. National Clinical Effectiveness Committee. National Early  
32  
33 Warning Score, National Clinical Guideline No. 1.  
34  
35 [http://health.gov.ie/wp-content/uploads/2014/08/NEWSFull-](http://health.gov.ie/wp-content/uploads/2014/08/NEWSFull-Report-August2014.pdf)  
36  
37 [Report-August2014.pdf](http://health.gov.ie/wp-content/uploads/2014/08/NEWSFull-Report-August2014.pdf)  
38  
39
- 40  
41 13. National Clinical Effectiveness Committee. Communication  
42  
43 (Clinical Handover) in Acute and Children's Hospital Services,  
44  
45 National Clinical Guideline No. 11. [http://health.gov.ie/wp-](http://health.gov.ie/wp-content/uploads/2015/12/NCG-No-11-Clinical-Handover-Acute-and-Childrens-Hospital-Services-Full-Report.pdf)  
46  
47 [content/uploads/2015/12/NCG-No-11-Clinical-Handover-Acute-](http://health.gov.ie/wp-content/uploads/2015/12/NCG-No-11-Clinical-Handover-Acute-and-Childrens-Hospital-Services-Full-Report.pdf)  
48  
49 [and-Childrens-Hospital-Services-Full-Report.pdf](http://health.gov.ie/wp-content/uploads/2015/12/NCG-No-11-Clinical-Handover-Acute-and-Childrens-Hospital-Services-Full-Report.pdf)  
50  
51  
52
- 53  
54 14. British Medical Association. Safe handover: safe patients.  
55  
56  
57  
58 Guidance on clinical handover for clinicians and managers. London:  
59  
60

1  
2  
3 *BMA. 2004.* <http://www.bma.org.uk/ap.nsf/Content/Handover>

4  
5  
6 15. Australian Medical Association 2006, Safe Handover-safe  
7  
8 patients: guidance on clinical handover for clinicians and managers.

9  
10  
11 *AMA. 2006.*

12  
13  
14 [https://ama.com.au/sites/default/files/documents/Clinical\\_Handover\\_0.pdf](https://ama.com.au/sites/default/files/documents/Clinical_Handover_0.pdf)

15  
16  
17  
18 16. Joint Commission on Accreditation of Healthcare  
19  
20 Organizations. National patient safety goals. *Joint Commission. 2005.*  
21  
22  
23 <https://www.jointcommission.org/PatientSafety/NationalPatientSafetyGoals/>.

24  
25  
26 17. Keane MT, Eysenck MW. Cognitive Psychology: A student's  
27  
28 handbook: *Psychology Press, 2000.*

29  
30  
31 18. Starmer AJ, Spector ND, Srivastava R, West DC et al. Changes in  
32  
33 medical errors after implementation of a handoff program. *N Engl J*  
34  
35 *Med 2014; 371:1803-1812.*

## 36 37 38 39 40 41 42 43 44 **Legends**

45  
46  
47 Table 1. Demographic characteristics of the three study groups: e-  
48  
49 learning alone (E), e-learning plus standard simulation (E+S) and e-  
50  
51 learning plus proficiency-based progression simulation (E+PBP) .  
52  
53  
54  
55  
56  
57  
58  
59  
60

1  
2  
3  
4  
5  
6  
7  
8  
9  
10  
11  
12  
13  
14  
15  
16  
17  
18  
19  
20  
21  
22  
23  
24  
25  
26  
27  
28  
29  
30  
31  
32  
33  
34  
35  
36  
37  
38  
39  
40  
41  
42  
43  
44  
45  
46  
47  
48  
49  
50  
51  
52  
53  
54  
55  
56  
57  
58  
59  
60

Figure 1. Consort diagram outlining selection, allocation and follow up of undergraduate medical and nursing participants in a study comparing the effect of e-learning alone (E), e-learning plus standard simulation (E+S) and e-learning plus proficiency-based progression simulation (E+PBP) on clinical communication.

Figure 2. Outline of experimental design and study flow indicating training interventions and assessment of the three study training groups (E, E+S, E+PBP) of undergraduate medical and nursing participants.

Figure 3. Outline of the high fidelity simulation performance assessment case for nursing undergraduates

Figure 4. Extract from the nursing metric scoring sheet illustrating some of the metrics and the proficiency benchmark for the high fidelity simulation assessment case.

Figure 5. The percentages reaching the proficiency benchmark at the end of training of the three study training groups; e-learning alone

1  
2  
3 (E), e-learning plus standard simulation training (E+S) and e-learning  
4  
5  
6 plus proficiency-based progression simulation training (E+PBP).  
7  
8  
9

10  
11 Figure 6. Logistic regression analysis for the relative differences  
12  
13  
14 between the three study training groups of undergraduate medical  
15  
16  
17 and nursing participants; E, E+S and E+PBP.  
18  
19  
20  
21  
22  
23  
24  
25  
26  
27  
28  
29  
30  
31  
32  
33  
34  
35  
36  
37  
38  
39  
40  
41  
42  
43  
44  
45  
46  
47  
48  
49  
50  
51  
52  
53  
54  
55  
56  
57  
58  
59  
60

1  
2  
3  
4  
5  
6  
7  
8  
9  
10  
11  
12  
13  
14  
15  
16  
17  
18  
19  
20  
21  
22  
23  
24  
25  
26  
27  
28  
29  
30  
31  
32  
33  
34  
35  
36  
37  
38  
39  
40  
41  
42  
43  
44  
45  
46  
47  
48  
49  
50  
51  
52  
53  
54  
55  
56  
57  
58  
59  
60

For peer review only

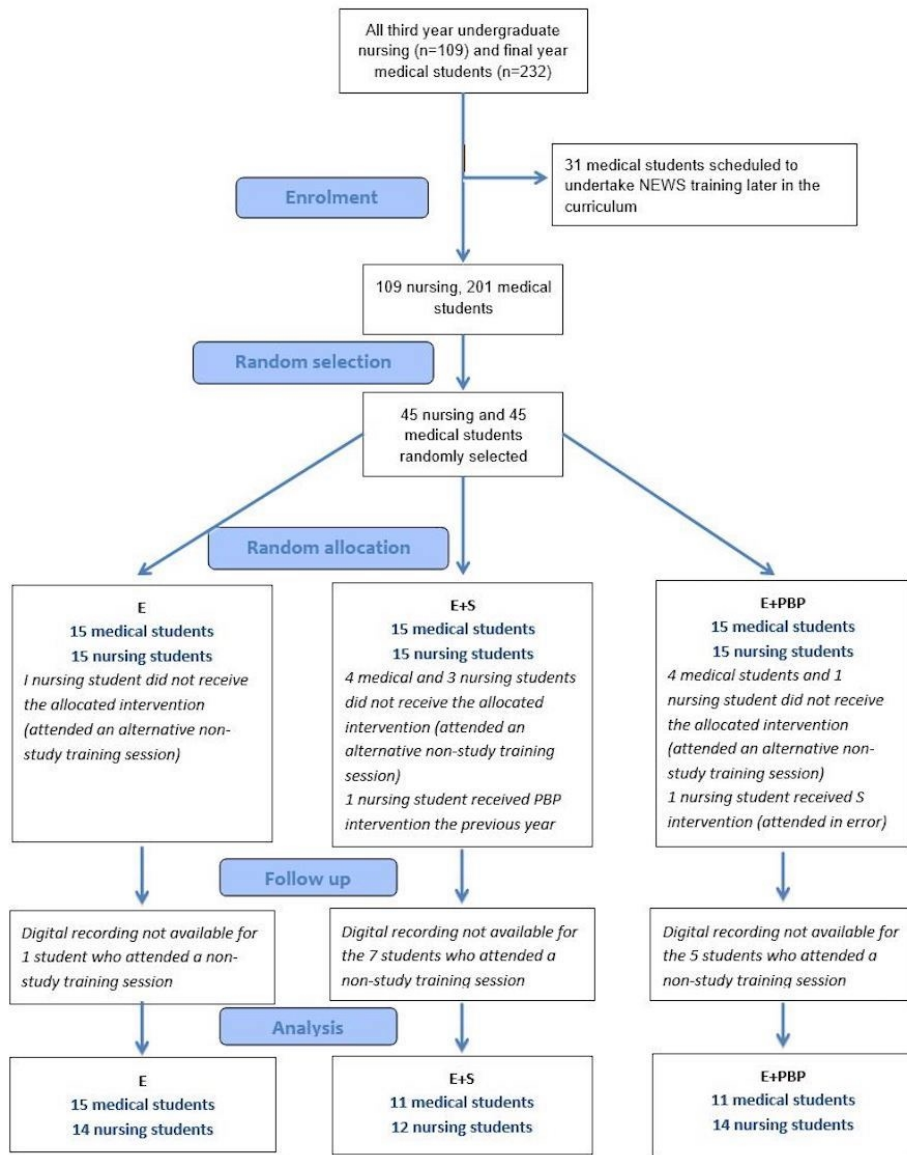

Figure 1. Consort diagram outlining selection, allocation and follow up of undergraduate medical and nursing participants in a study comparing the effect of e-learning alone (E), e-learning plus standard simulation (E+S) and e-learning plus proficiency-based progression simulation (E+PBP) on clinical communication.

76x98mm (300 x 300 DPI)



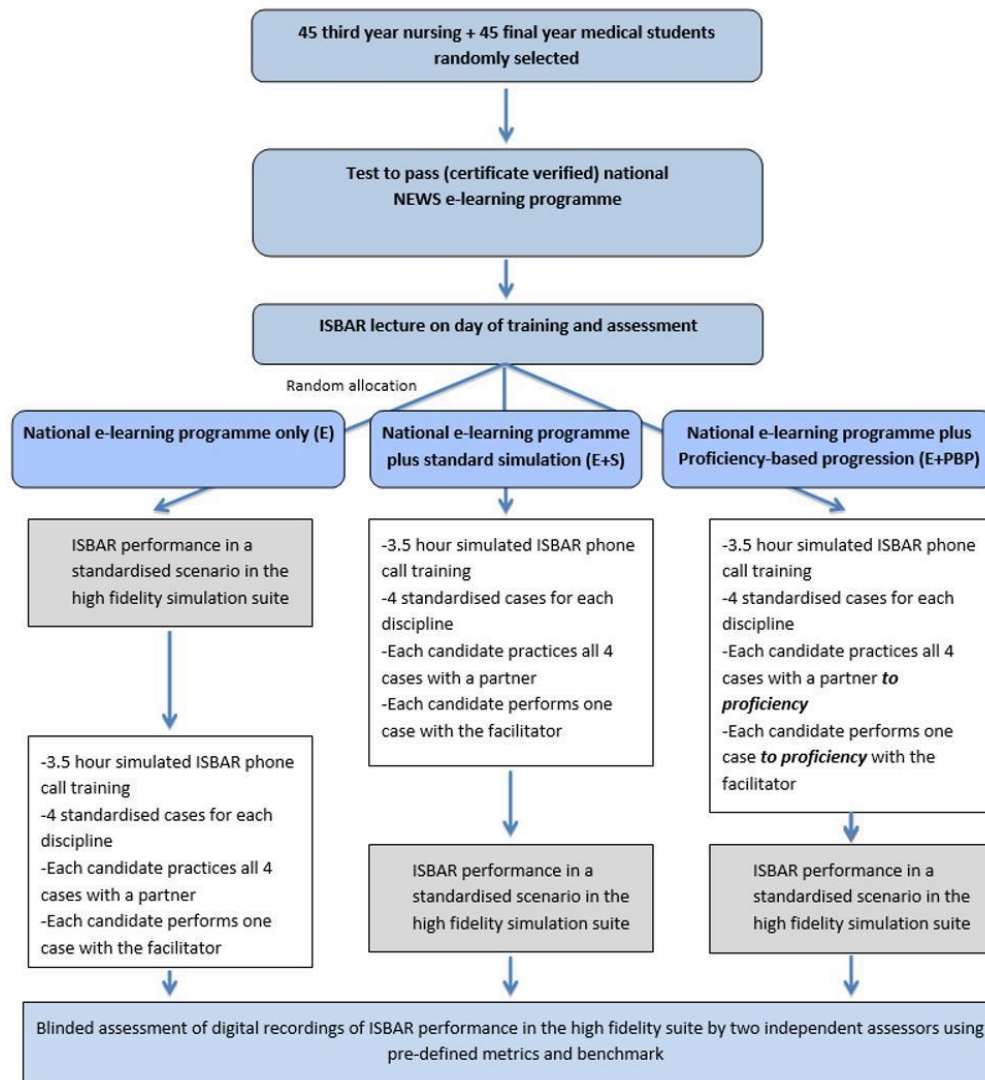

Figure 2. Outline of experimental design and study flow indicating training interventions and assessment of the three study training groups (E, E+S, E+PBP) of undergraduate medical and nursing participants.

82x90mm (300 x 300 DPI)

| Simulator Parameters |                              | Roleplayer vocals                                                                                                                                                                                                                                                    | Escalation Call                                                                                                           |  |
|----------------------|------------------------------|----------------------------------------------------------------------------------------------------------------------------------------------------------------------------------------------------------------------------------------------------------------------|---------------------------------------------------------------------------------------------------------------------------|--|
| 2                    | RR                           | 21                                                                                                                                                                                                                                                                   | 2 days post laparotomy                                                                                                    |  |
| 3                    | SpO <sub>2</sub>             | 96%                                                                                                                                                                                                                                                                  | you feel <b>very tired and weak</b>                                                                                       |  |
| 4                    | oxygen                       | Room Air                                                                                                                                                                                                                                                             | you think you should be feeling better than you are                                                                       |  |
| 5                    | BP                           | 92/58                                                                                                                                                                                                                                                                | Do not ask any questions or provide any information throughout this phone-call except to answer the below questions       |  |
| 6                    | HR                           | 98                                                                                                                                                                                                                                                                   | you thought you would be improving at this stage                                                                          |  |
| 7                    | AVPU                         | Alert                                                                                                                                                                                                                                                                | if asked you feel your pain is less controlled than yesterday                                                             |  |
| 8                    | Temp                         | 36.7                                                                                                                                                                                                                                                                 | you are still nil by mouth                                                                                                |  |
| 9                    | EWS                          | 5                                                                                                                                                                                                                                                                    | you now have a temporary ileostomy and are a quite upset about this, but know it will hopefully be reversed in the future |  |
| 10                   | Cardiac monitor              | Sinus tachycardia (if attached to CM)                                                                                                                                                                                                                                |                                                                                                                           |  |
| 11                   | Cap refill                   | less than 2sec                                                                                                                                                                                                                                                       |                                                                                                                           |  |
| 12                   | skin                         | pink, warm, dry                                                                                                                                                                                                                                                      |                                                                                                                           |  |
| 13                   | Urinary output (0.5ml/kg/hr) | 20mls last hour                                                                                                                                                                                                                                                      | If recipient name not confirmed, and you are asked "is this the intern/SHO/reg?"                                          |  |
| 14                   | IV site                      | VIP = 0 [visual infusion phlebitis score]                                                                                                                                                                                                                            | If asked for any recommendation                                                                                           |  |
| 15                   | IV hydration                 | 125mls/hr                                                                                                                                                                                                                                                            | If told "I think she is bleeding/needs review/has sepsis"                                                                 |  |
| 16                   | Pain                         | <b>Student to assess</b><br>if asked for PCA - 32mls in syringe; 35 demands, 18 successful]                                                                                                                                                                          | If asked "Will you review her?"                                                                                           |  |
| 17                   | Bowel sounds                 | <b>Student to assess</b> absent                                                                                                                                                                                                                                      | If asked "When will you review her?"                                                                                      |  |
| 18                   | Abdomen                      | <b>wound</b> - assess independently<br><b>drain</b> assess independently<br><b>ileostomy</b> : assess independently<br><b>distension</b> yes abdomen is distended                                                                                                    | If told "Her EWS is (3-7), so you must review her in 30mins"                                                              |  |
| 19                   | Blood Loss                   | <b>If students enquire requiring volume in drain/ileostomy</b> - say "you may assess independently"<br>If students pick up a jug to empty either give them the relevant volume " <b>there are 250mls in the drain</b> " " <b>there are 100mls in the ileostomy</b> " | If asked "Will you review her in 30 minutes/straight away?"                                                               |  |
| 20                   | Chest sounds                 | normal                                                                                                                                                                                                                                                               |                                                                                                                           |  |
| 21                   | Cap blood sugar              | 5.8mmol/L                                                                                                                                                                                                                                                            |                                                                                                                           |  |

| Extract from Nursing Simulation Metric                                                                                 |   |                                                                                                                                                                                                                                   |                                        |                                         |                                                             |
|------------------------------------------------------------------------------------------------------------------------|---|-----------------------------------------------------------------------------------------------------------------------------------------------------------------------------------------------------------------------------------|----------------------------------------|-----------------------------------------|-------------------------------------------------------------|
|                                                                                                                        |   |                                                                                                                                                                                                                                   | Tick if present                        | Tick if present                         | Tick if present                                             |
| 16                                                                                                                     | S | States the situation<br><i>There is 100-300mls of blood in drain or if not exact volume qualifies with (a lot, significant amount, unusual amount, quite a bit) AND/OR states blood in ileostomy bag no qualification needed.</i> |                                        |                                         |                                                             |
| 17                                                                                                                     | S | States the situation<br><i>Her urinary output 20mls/hr</i>                                                                                                                                                                        |                                        |                                         |                                                             |
| 18                                                                                                                     | S | States the situation<br><b>States patient is on IV fluids</b>                                                                                                                                                                     |                                        |                                         |                                                             |
| 19                                                                                                                     | B | Background information<br><i>States she has history of Crohn's disease states history</i>                                                                                                                                         |                                        |                                         |                                                             |
| 20                                                                                                                     | B | Background information<br><i>States she is two days post laparotomy/ileostomy/bowel resection</i>                                                                                                                                 |                                        |                                         |                                                             |
| 21                                                                                                                     | B | Irrelevant background<br><i>States fractured humerus two years ago</i>                                                                                                                                                            |                                        |                                         |                                                             |
| 22                                                                                                                     | A | Assessment<br><i>Gives relevant case specific assessment</i>                                                                                                                                                                      |                                        |                                         |                                                             |
| 23                                                                                                                     | A | Assessment<br><i>I think she is bleeding</i><br>+/- patient is hypovolemic                                                                                                                                                        |                                        |                                         |                                                             |
| 24                                                                                                                     | R | Seeks a recommendation from recipient<br><i>Do you want me to do anything else/what else would you recommend?</i>                                                                                                                 |                                        |                                         |                                                             |
| 25                                                                                                                     | R | Omits to "repeat back"<br><i>You would like me to give her a fluid bolus of 500mls and the time frame agreed for review</i><br><i>[eg: straight away/ in 30 minutes]</i>                                                          |                                        |                                         |                                                             |
| 26                                                                                                                     | R | Uses own notes and/or an ISBAR sticker to aid phone call                                                                                                                                                                          |                                        |                                         |                                                             |
| 27                                                                                                                     |   | Length of call [seconds]                                                                                                                                                                                                          | secs                                   |                                         |                                                             |
|                                                                                                                        |   |                                                                                                                                                                                                                                   | no. of steps =<br>no. of boxes checked | no. of errors =<br>no. of boxes checked | no. of critical errors =<br>no. of boxes <b>NOT</b> checked |
| <b>TOTALS</b>                                                                                                          |   |                                                                                                                                                                                                                                   |                                        |                                         |                                                             |
| <b>Proficiency Benchmark</b>                                                                                           |   | <b>Proficiency Demonstrated</b> [tick box]                                                                                                                                                                                        | <b>Observer's Initial</b>              |                                         |                                                             |
| <ul style="list-style-type: none"> <li>Steps ≥ 6</li> <li>No more than 4 Errors, 3 of which may be critical</li> </ul> |   | <input type="checkbox"/> YES <input type="checkbox"/> NO                                                                                                                                                                          |                                        |                                         |                                                             |

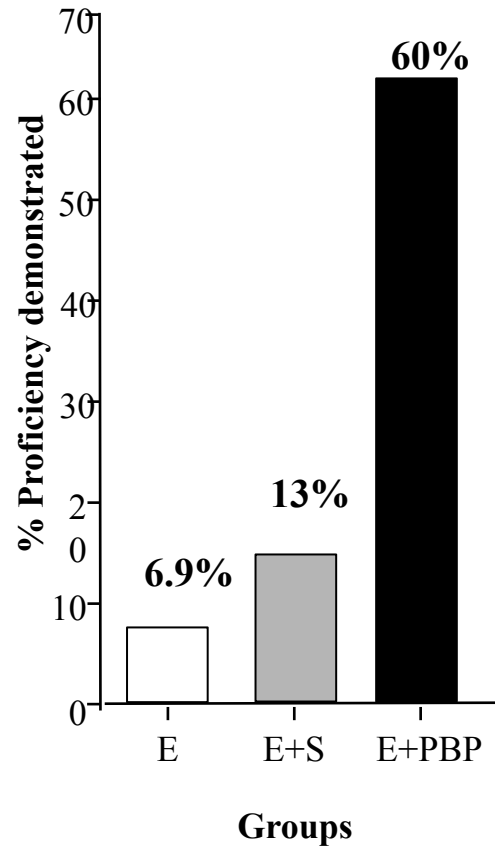

1  
2  
3  
4  
5  
6  
7  
8  
9  
10  
11  
12  
13  
14  
15  
16  
17  
18  
19  
20  
21  
22  
23  
24  
25  
26  
27  
28  
29  
30  
31  
32  
33  
34  
35  
36  
37  
38  
39  
40  
41

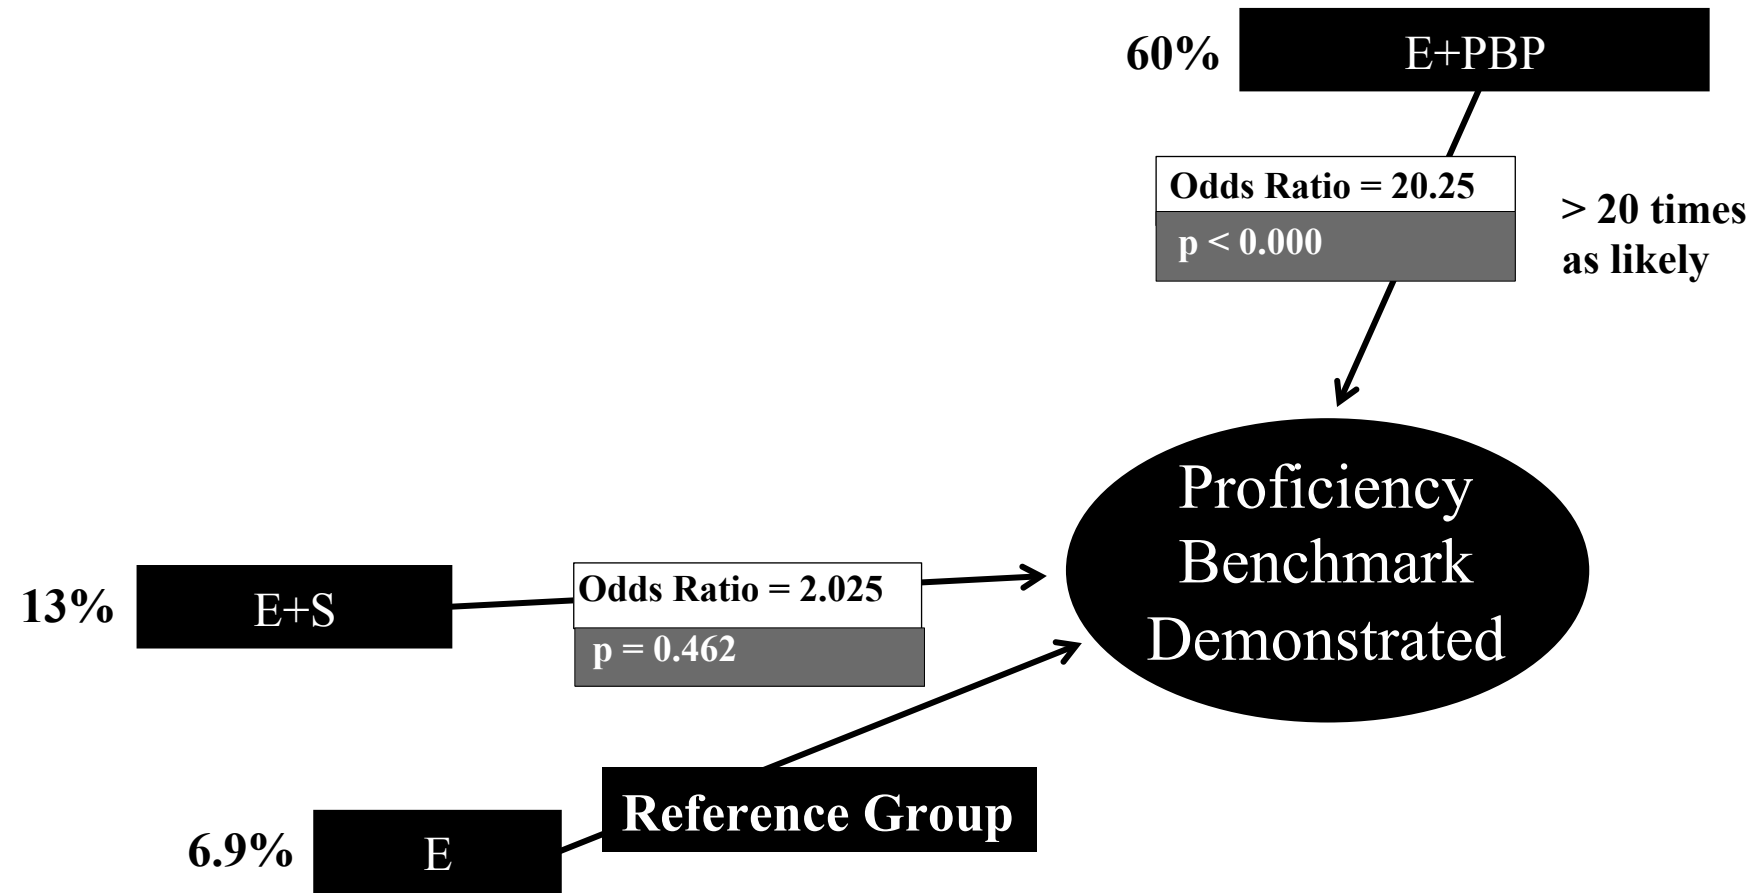

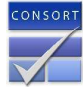

## CONSORT 2010 checklist of information to include when reporting a randomised trial\*

| Section/Topic                    | Item No | Checklist item                                                                                                                                                                              | Reported on page No   |
|----------------------------------|---------|---------------------------------------------------------------------------------------------------------------------------------------------------------------------------------------------|-----------------------|
| <b>Title and abstract</b>        |         |                                                                                                                                                                                             |                       |
|                                  | 1a      | Identification as a randomised trial in the title                                                                                                                                           | 1                     |
|                                  | 1b      | Structured summary of trial design, methods, results, and conclusions (for specific guidance see CONSORT for abstracts)                                                                     | 1-3                   |
| <b>Introduction</b>              |         |                                                                                                                                                                                             |                       |
| Background and objectives        | 2a      | Scientific background and explanation of rationale                                                                                                                                          | 5                     |
|                                  | 2b      | Specific objectives or hypotheses                                                                                                                                                           | 7                     |
| <b>Methods</b>                   |         |                                                                                                                                                                                             |                       |
| Trial design                     | 3a      | Description of trial design (such as parallel, factorial) including allocation ratio                                                                                                        | 7                     |
|                                  | 3b      | Important changes to methods after trial commencement (such as eligibility criteria), with reasons                                                                                          | n/a                   |
| Participants                     | 4a      | Eligibility criteria for participants                                                                                                                                                       | 8                     |
|                                  | 4b      | Settings and locations where the data were collected                                                                                                                                        | 8                     |
| Interventions                    | 5       | The interventions for each group with sufficient details to allow replication, including how and when they were actually administered                                                       | 8/9/10/11<br>Figure 2 |
| Outcomes                         | 6a      | Completely defined pre-specified primary and secondary outcome measures, including how and when they were assessed                                                                          | 11 and 5<br>protocol  |
|                                  | 6b      | Any changes to trial outcomes after the trial commenced, with reasons                                                                                                                       | n/a                   |
| Sample size                      | 7a      | How sample size was determined                                                                                                                                                              | 13                    |
|                                  | 7b      | When applicable, explanation of any interim analyses and stopping guidelines                                                                                                                | n/a                   |
| <b>Randomisation:</b>            |         |                                                                                                                                                                                             |                       |
| Sequence generation              | 8a      | Method used to generate the random allocation sequence                                                                                                                                      | 14                    |
|                                  | 8b      | Type of randomisation; details of any restriction (such as blocking and block size)                                                                                                         | 14                    |
| Allocation concealment mechanism | 9       | Mechanism used to implement the random allocation sequence (such as sequentially numbered containers), describing any steps taken to conceal the sequence until interventions were assigned | 14                    |
| Implementation                   | 10      | Who generated the random allocation sequence, who enrolled participants, and who assigned participants to interventions                                                                     | 2/3 protocol          |
| Blinding                         | 11a     | If done, who was blinded after assignment to interventions (for example, participants, care providers, those                                                                                | 14, 15                |

|    |                          |                                                                                                                     |                 |
|----|--------------------------|---------------------------------------------------------------------------------------------------------------------|-----------------|
| 1  |                          |                                                                                                                     |                 |
| 2  |                          | assessing outcomes) and how                                                                                         |                 |
| 3  |                          |                                                                                                                     |                 |
| 4  |                          | 11b If relevant, description of the similarity of interventions                                                     | 8/9/10/11       |
| 5  | Statistical methods      | 12a Statistical methods used to compare groups for primary and secondary outcomes                                   | 15              |
| 6  |                          | 12b Methods for additional analyses, such as subgroup analyses and adjusted analyses                                | n/a             |
| 7  |                          |                                                                                                                     |                 |
| 8  | <b>Results</b>           |                                                                                                                     |                 |
| 9  | Participant flow (a      | 13a For each group, the numbers of participants who were randomly assigned, received intended treatment, and        | Figure 1        |
| 10 | diagram is strongly      | were analysed for the primary outcome                                                                               |                 |
| 11 | recommended)             | 13b For each group, losses and exclusions after randomisation, together with reasons                                | Figure 1        |
| 12 | Recruitment              | 14a Dates defining the periods of recruitment and follow-up                                                         | 8               |
| 13 |                          | 14b Why the trial ended or was stopped                                                                              | n/a             |
| 14 | Baseline data            | 15 A table showing baseline demographic and clinical characteristics for each group                                 | Table 1         |
| 15 | Numbers analysed         | 16 For each group, number of participants (denominator) included in each analysis and whether the analysis was      | Figure 1        |
| 16 |                          | by original assigned groups                                                                                         |                 |
| 17 |                          |                                                                                                                     |                 |
| 18 | Outcomes and             | 17a For each primary and secondary outcome, results for each group, and the estimated effect size and its           | 15,16           |
| 19 | estimation               | precision (such as 95% confidence interval)                                                                         |                 |
| 20 |                          | 17b For binary outcomes, presentation of both absolute and relative effect sizes is recommended                     | 15,16           |
| 21 | Ancillary analyses       | 18 Results of any other analyses performed, including subgroup analyses and adjusted analyses, distinguishing       | n/a             |
| 22 |                          | pre-specified from exploratory                                                                                      |                 |
| 23 |                          |                                                                                                                     |                 |
| 24 | Harms                    | 19 All important harms or unintended effects in each group (for specific guidance see CONSORT for harms)            | n/a             |
| 25 |                          |                                                                                                                     |                 |
| 26 | <b>Discussion</b>        |                                                                                                                     |                 |
| 27 | Limitations              | 20 Trial limitations, addressing sources of potential bias, imprecision, and, if relevant, multiplicity of analyses | 15/16           |
| 28 | Generalisability         | 21 Generalisability (external validity, applicability) of the trial findings                                        | 19              |
| 29 | Interpretation           | 22 Interpretation consistent with results, balancing benefits and harms, and considering other relevant evidence    | 19              |
| 30 |                          |                                                                                                                     |                 |
| 31 | <b>Other information</b> |                                                                                                                     |                 |
| 32 | Registration             | 23 Registration number and name of trial registry                                                                   | ClinicalTrials  |
| 33 |                          |                                                                                                                     |                 |
| 34 |                          |                                                                                                                     | .govNCT02886    |
| 35 |                          |                                                                                                                     |                 |
| 36 |                          |                                                                                                                     | 754             |
| 37 |                          |                                                                                                                     |                 |
| 38 |                          |                                                                                                                     |                 |
| 39 | Protocol                 | 24 Where the full trial protocol can be accessed, if available                                                      | Attached,Clini  |
| 40 |                          |                                                                                                                     | cal trials.gov, |
| 41 |                          |                                                                                                                     |                 |

1  
2  
3  
4 Funding 25 Sources of funding and other support (such as supply of drugs), role of funders

---

and attached  
none

---

5  
6 \*We strongly recommend reading this statement in conjunction with the CONSORT 2010 Explanation and Elaboration for important clarifications on all the items. If relevant, we also  
7 recommend reading CONSORT extensions for cluster randomised trials, non-inferiority and equivalence trials, non-pharmacological treatments, herbal interventions, and pragmatic trials.  
8 Additional extensions are forthcoming: for those and for up to date references relevant to this checklist, see [www.consort-statement.org](http://www.consort-statement.org).  
9

10  
11  
12  
13  
14  
15  
16  
17  
18  
19  
20  
21  
22  
23  
24  
25  
26  
27  
28  
29  
30  
31  
32  
33  
34  
35  
36  
37  
38  
39  
40  
41  
42  
43  
44  
45  
46  
47

For peer review only



# BMJ Open

## The effect of a proficiency-based progression simulation programme on clinical communication for the deteriorating patient: A randomised controlled trial.

|                                 |                                                                                                                                                                                                                                                                                                                                                                                                                                                                                                                         |
|---------------------------------|-------------------------------------------------------------------------------------------------------------------------------------------------------------------------------------------------------------------------------------------------------------------------------------------------------------------------------------------------------------------------------------------------------------------------------------------------------------------------------------------------------------------------|
| Journal:                        | <i>BMJ Open</i>                                                                                                                                                                                                                                                                                                                                                                                                                                                                                                         |
| Manuscript ID                   | bmjopen-2018-025992.R2                                                                                                                                                                                                                                                                                                                                                                                                                                                                                                  |
| Article Type:                   | Research                                                                                                                                                                                                                                                                                                                                                                                                                                                                                                                |
| Date Submitted by the Author:   | 13-May-2019                                                                                                                                                                                                                                                                                                                                                                                                                                                                                                             |
| Complete List of Authors:       | Breen, Dorothy; Cork University Hospital Group, Department of Anaesthesia and Intensive Care<br>O'Brien, Sinead; University College Cork National University of Ireland, School of Nursing and Midwifery<br>McCarthy, Nora; University College Cork National University of Ireland, Medical Education Unit, School of Medicine<br>Gallagher, Anthony; Ulster University , Faculty of Life and Health Sciences<br>Walshe, Nuala; University College Cork National University of Ireland, School of Nursing and Midwifery |
| <b>Primary Subject Heading</b>: | Communication                                                                                                                                                                                                                                                                                                                                                                                                                                                                                                           |
| Secondary Subject Heading:      | Communication, Medical education and training, Nursing                                                                                                                                                                                                                                                                                                                                                                                                                                                                  |
| Keywords:                       | Handover, Simulation, Safety, Communication, Assessment, Performance                                                                                                                                                                                                                                                                                                                                                                                                                                                    |
|                                 |                                                                                                                                                                                                                                                                                                                                                                                                                                                                                                                         |

SCHOLARONE™  
Manuscripts

1  
2  
3 The effect of a proficiency-based progression simulation programme  
4  
5  
6 on clinical communication for the deteriorating patient: A  
7  
8 randomised controlled trial.  
9  
10

11  
12  
13  
14 1. Dr Dorothy Breen FFARCSI, FCICM, MD\*, Cork University Hospital  
15  
16 and the ASSERT Centre, University College Cork, Cork, Ireland.  
17

18  
19 2. Sinéad O'Brien RGN, MSC, School of Nursing and Midwifery at  
20  
21 University College Cork, Cork Ireland.  
22

23  
24  
25 3. Dr Nora McCarthy MICGP, MMH, School of Medicine, University  
26  
27 College Cork, Cork Ireland  
28

29  
30 4. Prof Anthony G Gallagher PhD, DSc, Faculty of Life and Health  
31  
32 Sciences, Ulster University, Londonderry, United Kingdom.  
33

34  
35  
36 5. Nuala Walshe RN, MTLHE, MN, School of Nursing and Midwifery,  
37  
38 University College Cork, Cork, Ireland  
39

40  
41 \*Corresponding author Dr Dorothy Breen, [dorothy.breen@hse.ie](mailto:dorothy.breen@hse.ie),

42  
43  
44 *Department of Intensive Care, Cork University Hospital, Wilton, Cork,*  
45  
46 *Ireland. Tel 00353-21-4546434, Fax 00353-21 4922135*  
47  
48  
49  
50  
51

52 Word Count: 4,394 including abstract

53  
54  
55 Key words: Medical Education and Training, Handover, Simulation,  
56  
57  
58 Safety.  
59  
60

1  
2  
3  
4  
5  
6  
7  
8  
9  
10  
11  
12  
13  
14  
15  
16  
17  
18  
19  
20  
21  
22  
23  
24  
25  
26  
27  
28  
29  
30  
31  
32  
33  
34  
35  
36  
37  
38  
39  
40  
41  
42  
43  
44  
45  
46  
47  
48  
49  
50  
51  
52  
53  
54  
55  
56  
57  
58  
59  
60

For peer review only

1  
2  
3 The effect of a proficiency-based progression simulation programme  
4  
5  
6 on clinical communication for the deteriorating patient: A  
7  
8 randomised controlled trial.  
9  
10  
11  
12  
13

14 **ABSTRACT**

15  
16  
17 **Objective**

18  
19 To determine the effectiveness of a proficiency-based progression  
20 training approach to clinical communication in the context of a  
21 clinically deteriorating patient.  
22  
23  
24  
25  
26  
27

28 **Design**

29  
30 A randomised controlled trial with three parallel arms.  
31  
32

33 **Setting**

34  
35 A university setting in Ireland  
36  
37

38 **Participants**

39  
40 45 third year nursing and 45 final year medical undergraduates  
41 scheduled to undertake interdisciplinary National Early Warning  
42 Score (NEWS) training over a three day period in September 2016.  
43  
44  
45  
46  
47  
48

49 **Interventions**

50  
51 Participants were prospectively randomised to one of three groups  
52 before undertaking a performance assessment of the ISBAR  
53 communication tool (Identification, Situation, Background,  
54  
55  
56  
57  
58  
59  
60

1  
2  
3 Assessment, Recommendation) relevant to a deteriorating patient in  
4  
5  
6 a high fidelity simulation facility. The groups were as follows (i) E;  
7  
8 the Irish Health Service national NEWS e-learning programme only,  
9  
10  
11 (ii) E+S; the national e-learning programme plus standard  
12  
13  
14 simulation, and (iii) E+PBP; the national e-learning programme plus  
15  
16  
17 proficiency-based progression simulation.  
18

### 19 20 Main outcome measures

21  
22 The primary outcome was the proportion in each group reaching a  
23  
24 pre-defined proficiency benchmark comprising a series of pre-  
25  
26 defined steps, errors and critical errors during the performance of a  
27  
28 standardised, high fidelity simulation assessment case which was  
29  
30 recorded and scored by two independent blinded assessors.  
31  
32  
33  
34

### 35 36 Results

37  
38 6.9% (2/29) of the E group and 13% (3/23) of the E+S group  
39  
40 demonstrated proficiency in comparison to 60% (15/25) of the  
41  
42 E+PBP group. The difference between the E and the E+S groups was  
43  
44 not statistically significant (Chi-Square = 0.55, 99%, CI =0.63-0.66, p=  
45  
46 0.63) but was significant for the difference between the E and the E  
47  
48 +PBP groups (Chi-Square = 22.25, CI=0.00-0.00, p < 0.000) and  
49  
50 between the E+S and the E+PBP groups (Chi-Square = 11.04, CI=0.00-  
51  
52 0.00, p = 0.001).  
53  
54  
55  
56  
57  
58  
59  
60

## Conclusions

Proficiency-based progression is a more effective way to teach clinical communication in the context of the deteriorating patient than e-learning either alone or in combination with standard simulation.

## Trial Registration

ClinicalTrials.gov Identifier: NCT02886754

## STRENGTHS AND LIMITATIONS OF THE STUDY

- This is the first randomised controlled trial of a proficiency-based progression educational intervention for a non-technical skill.
- The performance outcomes are robust objective measurements which do not rely on subjective assessments or learner perceptions.
- Limitations are the single centre design and the future need for the impact of proficiency-based progression programmes on patient outcomes.

Funding Statement: This research received no specific grant from any funding agency in the public, commercial or not-for-profit sectors.

Competing interests: All authors have completed the ICMJE uniform

1  
2  
3 disclosure form at [www.icmje.org/coi\\_disclosure.pdf](http://www.icmje.org/coi_disclosure.pdf) and declare: no  
4  
5  
6 support from any organisation for the submitted work, no financial  
7  
8  
9 relationships with any organisations that might have an interest in  
10  
11  
12 the submitted work in the previous three years; no other  
13  
14  
15 relationships or activities that could appear to have influenced the  
16  
17  
18 submitted work.

19  
20  
21  
22 Ethical Approval: Institutional review board approval was obtained.  
23  
24  
25 Informed written consent was obtained from all participants.  
26  
27  
28  
29

30  
31 Transparency: The lead author affirms that the manuscript is an  
32  
33  
34 honest, accurate and transparent account of the study being  
35  
36  
37 reported; that no important aspects have been omitted; and that any  
38  
39  
40 discrepancies from the study as planned have been explained.  
41  
42  
43

44  
45 The Corresponding Author has the right to grant on behalf of all  
46  
47  
48 authors and does grant on behalf of all authors, [a worldwide](#)  
49  
50  
51 [licence](#) to the Publishers and its licensees in perpetuity, in all forms,  
52  
53  
54 formats and media (whether known now or created in the future), to  
55  
56  
57 i) publish, reproduce, distribute, display and store the Contribution,  
58  
59  
60 ii) translate the Contribution into other languages, create

1  
2  
3 adaptations, reprints, include within collections and create  
4  
5 summaries, extracts and/or, abstracts of the Contribution, iii) create  
6  
7 any other derivative work(s) based on the Contribution, iv) to exploit  
8  
9 all subsidiary rights in the Contribution, v) the inclusion of electronic  
10  
11 links from the Contribution to third party material where-ever it may  
12  
13 be located; and, vi) licence any third party to do any or all of the  
14  
15 above.  
16  
17  
18  
19  
20  
21

22 All authors listed below met ICMJE criteria for contributorship as  
23  
24 outlined below.  
25  
26

27 Dr Dorothy Breen

- 28  
29  
30 1. Contributed substantially to the conception and design of the work;  
31  
32 the acquisition, of the data for the work; AND  
33  
34  
35 2. Drafting the work, revising the work critically for important  
36  
37 intellectual content AND  
38  
39  
40 3. Drafting the final version to be published; AND  
41  
42  
43 4. Agrees to be accountable for all aspects of the work in ensuring  
44  
45 that questions related to the accuracy or integrity of any part of the  
46  
47 work are appropriately investigated and resolved.  
48  
49  
50

51 Sinead O'Brien

- 52  
53  
54 1. Contributed substantially to the conception and design of the  
55  
56 work; and the acquisition, of data for the work; AND  
57  
58  
59  
60



1  
2  
3 2.Revising the work critically for important intellectual content; AND

4  
5  
6 3. Final approval of the version to be published; AND

7  
8  
9 4. Agrees to be accountable for all aspects of the work in ensuring  
10  
11 that questions related to the accuracy or integrity of any part of the  
12  
13 work are appropriately investigated and resolved.  
14

15  
16  
17 Dr Nora McCarthy

18  
19  
20 1. Contributed substantially to the conception and design of the  
21  
22 work; and the acquisition, AND  
23

24  
25 3. Revising the work critically for important intellectual content;  
26  
27  
28 AND

29  
30 4 Final approval of the version to be published; AND

31  
32  
33 5. Agrees to be accountable for all aspects of the work in ensuring  
34  
35 that questions related to the accuracy or integrity of any part of the  
36  
37 work are appropriately investigated and resolved.  
38  
39

40  
41 Prof Anthony G Gallagher

42  
43  
44 1. Contributed substantially to the conception and design of the  
45  
46 work; and the analysis and interpretation of data for the work; AND  
47  
48

49  
50 2. Revising the work critically for important intellectual content;  
51  
52  
53 AND

54  
55 3. Final approval of the version to be published; AND

56  
57 Agreement to be accountable for all aspects of the work in 4. Agrees  
58  
59  
60

1  
2  
3 to ensure that questions related to the accuracy or integrity of any  
4  
5  
6 part of the work are appropriately investigated and resolved.  
7

8  
9 Nuala Walshe

- 10  
11 1. Contributed substantially to the conception and design of the  
12  
13 work; and the acquisition, of data for the work; AND  
14  
15  
16 2. Revising the work critically for important intellectual content;  
17  
18  
19 AND  
20  
21  
22 3. Final approval of the version to be published; AND  
23  
24  
25 4. Agrees to be accountable for all aspects of the work in ensuring  
26  
27 that questions related to the accuracy or integrity of any part of the  
28  
29 work are appropriately investigated and resolved.  
30  
31  
32  
33  
34  
35

36 Data Sharing: Deidentified individual participant data that underlie  
37  
38 the results published in this article as well as study protocol,  
39  
40 statistical analysis plan and analytical code will be made available on  
41  
42 request beginning three months and ending 5 years after publication  
43  
44 to researchers who provide a methodologically sound proposal.  
45  
46 Please direct requests to the corresponding author. Data accessors  
47  
48 will need to sign a data access agreement. The data from the pilot  
49  
50 study and from this study in relation to learner perceptions is  
51  
52 undergoing analysis and will be available following publication.  
53  
54  
55  
56  
57  
58  
59  
60

## Introduction

Simulation-based training is being increasingly deployed for both technical and non-technical skill acquisition in healthcare with the aim of reducing medical error and patient harm. There is a need for an evidence-based approach to such training to ensure that the resources utilised can reliably deliver a quantifiable improved skill set rather than just an enhanced educational experience. Proficiency-based progression (PBP) training is a form of outcomes-based training that involves training individuals to achieve a proficiency benchmark. The process involves “deliberate” practice against a set of clearly defined objective metrics. The proficiency benchmark is set as the mean performance of clinicians who undertake the procedure regularly in clinical practice. It has been shown to improve the performance of individuals undertaking technical procedures<sup>1, 2, 3, 4, 5, 6, 7</sup>. Metrics are operationally defined to facilitate objective scoring. For example in the study by Cates et al demonstrating improved performance of carotid angiography, pre-defined metric errors include “number of diagnostic catheters used to obtain diagnostic pictures” and “catheter advancing without a guide-wire in front of it”<sup>6</sup>. Despite these results, PBP methodology has not previously been

1  
2  
3 applied to simulation-based training for non-technical skills yet  
4  
5  
6 communication failures are a significant source of medical error and  
7  
8  
9 preventable adverse events equal if not greater than errors due to  
10  
11 lack of technical skill <sup>8, 9, 10</sup>. Escalation of care for an acutely  
12  
13 deteriorating patient demands the most efficient, concise and  
14  
15 accurate flow of information amongst healthcare workers of different  
16  
17 disciplines for the best outcome to be achieved.  
18  
19  
20  
21  
22

23 Early Warning Scores facilitate early detection of deterioration by  
24  
25 categorising a patient's severity of illness and prompting escalation  
26  
27 of care at specific trigger points utilising a structured communication  
28  
29 tool such as ISBAR (Identification, Situation, Background,  
30  
31 Assessment, Recommendation). This enables a more timely response  
32  
33 using a common language <sup>11</sup>. Ireland was one of the first countries to  
34  
35 agree and implement a standardised Early Warning Score (The  
36  
37 National Early Warning Score, NEWS) across the entire acute hospital  
38  
39 sector. NEWS utilises the ISBAR tool as the recommended structured  
40  
41 communication tool for the acutely deteriorating patient <sup>12, 13</sup>. The  
42  
43 National Early Warning Score (NEWS) e-learning education  
44  
45 programme is recommended as the national interdisciplinary  
46  
47 education programme for all healthcare professionals working in  
48  
49 acute services. The programme teaches ISBAR as the standardised  
50  
51  
52  
53  
54  
55  
56  
57  
58  
59  
60

1  
2  
3 tool to escalate care in the context of the acutely deteriorating  
4  
5  
6 patient.  
7  
8  
9

10 The primary aim of this study was to determine if the addition of a  
11  
12 proficiency-based progression simulation training programme to the  
13  
14 national NEWS e-learning module results in better performance of  
15  
16 clinical communication of a deteriorating patient than either the e-  
17  
18 learning module alone or in combination with standard simulation.  
19  
20  
21  
22  
23  
24  
25  
26  
27  
28  
29  
30  
31  
32  
33  
34  
35  
36  
37  
38  
39  
40  
41  
42  
43  
44  
45  
46  
47  
48  
49  
50  
51  
52  
53  
54  
55  
56  
57  
58  
59  
60

## Methods

### Study design

A randomised controlled trial with three parallel arms.

### Participants

Eligible participants were 109 third year nursing and 201 final year medical students who were scheduled to undertake interdisciplinary National Early Warning Score training in September 2016 as part of their undergraduate curriculum. This comprised the entire undergraduate nursing and medical classes except for 31 medical students who were scheduled to undertake this training at a later time in the curriculum (figure 1).

### Interventions

1  
2  
3 All 3<sup>rd</sup> year nursing and final year medical students were emailed  
4  
5  
6 prior to training and instructed to undertake the National Early  
7  
8  
9 Warning Score e-learning programme. Written informed consent  
10  
11 was obtained from all participants. On the day of training,  
12  
13  
14 participants were required to submit a certificate of successful  
15  
16  
17 completion of the e-learning programme. A 15-minute lecture on the  
18  
19  
20 ISBAR tool was delivered before participants undertook training as  
21  
22  
23 per their allocated groups. Students were not notified as to which  
24  
25  
26 study group they were allocated. The study flow is outlined in figure  
27  
28  
29  
30 2.

31 The three training groups were as follows:

32  
33 **(i) e-learning only group (E).** Participants in this group proceeded  
34  
35 immediately following the 15-minute lecture to the high fidelity suite  
36  
37 for performance assessment. After outcome assessment was  
38  
39 complete, participants undertook simulation training similar to the  
40  
41  
42 E+S group as outlined below in order to ensure that all students were  
43  
44  
45 afforded the same training opportunity from a curriculum  
46  
47  
48 perspective.  
49  
50

51  
52 **(ii) e-learning plus standard simulation group (E+S).** Participants  
53  
54 worked in pairs of a medical student and nursing student. If a  
55  
56  
57 participant did not have a partner, then a non-study peer student was  
58  
59  
60

1  
2  
3 asked to pair with that individual for the purposes of training. Data  
4  
5  
6 from the non-study student was not included in the analysis.  
7

8  
9 Training consisted of a series of simulated phone calls using four  
10  
11 standardised paper cases for each discipline. Case materials included  
12  
13 case notes, NEWS charts, and a blank ISBAR template indicating the  
14  
15 categories and type of information that should be communicated.  
16  
17 Each scenario had a deteriorating patient event that necessitated an  
18  
19 ISBAR telephone communication. Participants alternated between  
20  
21 making and receiving simulated phone calls. A standardised script  
22  
23 was given to the recipient. Two facilitators conducted the simulation  
24  
25 training. Both facilitators were experienced clinicians and educators  
26  
27 who had previously undergone the “Train the Trainer NEWS  
28  
29 programme” and regularly facilitate NEWS training and healthcare  
30  
31 simulation. The facilitators offered support and feedback in line with  
32  
33 standard NEWS training by listening to simulated phone calls and  
34  
35 offering guidance on the ISBAR framework and by answering  
36  
37 questions as they arose. Participants were required to work through  
38  
39 all four cases with their partner. Towards the end of the training  
40  
41 session the participants presented to the facilitator to repeat a  
42  
43 simulated phone call for either case 3 or 4. The training session was  
44  
45  
46  
47  
48  
49  
50  
51  
52  
53  
54  
55  
56  
57  
58 3.5 hours in duration, participants were required to stay until the end  
59  
60

1  
2  
3 of the training regardless of progress. If an individual had completed  
4  
5 all the cases, they were asked to assist by continuing to be the  
6  
7 recipient of phone calls for their partner or by continuing to practice  
8  
9 by repeating the cases if required.  
10  
11  
12

13  
14 **(iii) e-learning plus proficiency-based progression simulation**

15  
16 **group (E+PBP).** Participants underwent a training programme of  
17  
18 the same structure, duration (3.5 hours), content and facilitator:  
19  
20 student ratio as the E+S group. The same two facilitators facilitated  
21  
22 both the E+S and E+PBP training. However in the E+PBP group,  
23  
24 partners scored each other's phone calls during training against a  
25  
26 series of pre-defined metrics (quantified as steps, errors and critical  
27  
28 errors for each case) on a score sheet to ascertain if the proficiency  
29  
30 benchmark for that case was reached. Partners shared the results of  
31  
32 the metrics and proficiency scores with each other as feedback at the  
33  
34 end of each simulated phone call. If proficiency was not achieved the  
35  
36 case was repeated before progressing to the next case. Participants  
37  
38 were required to reach proficiency on all four cases with their  
39  
40 partner before performing case 3 or 4 with the facilitator and  
41  
42 demonstrating proficiency again. If proficiency was not achieved with  
43  
44 the facilitator then the participant returned to repeat cases with their  
45  
46 partner and present for reassessment to the facilitator until  
47  
48  
49  
50  
51  
52  
53  
54  
55  
56  
57  
58  
59  
60



1  
2  
3 proficiency was demonstrated. The training session was 3.5 hours in  
4  
5 duration, participants were required to stay until the end of the  
6  
7 training regardless of progress. If an individual had completed all the  
8  
9 cases, they were asked to assist by continuing to be the recipient of  
10  
11 phone calls for their partner or by continuing to practice by repeating  
12  
13 the cases if required.  
14  
15  
16  
17  
18  
19  
20  
21  
22

### 23 **Outcomes**

24  
25  
26  
27 The primary outcome was the ability to reach the proficiency  
28  
29 benchmark on the standardised high-fidelity simulation assessment  
30  
31 case. The secondary outcomes were the number of successfully  
32  
33 completed steps, errors and critical errors performed by each group.  
34  
35  
36  
37  
38

39  
40 Performance metrics were developed for the training cases and for  
41  
42 the high fidelity simulation assessment case as part of a pilot study in  
43  
44 the previous year. Each case presented a different but commonly  
45  
46 encountered clinical scenario of an acutely deteriorating patient. As  
47  
48 an example, the outline of the nursing component of the high fidelity  
49  
50 simulation assessment case is shown in figure 3.  
51  
52  
53  
54  
55  
56  
57  
58  
59  
60

1  
2  
3 The metrics were derived for each of the training and assessment  
4 cases according to the 5 components of the ISBAR tool and were  
5 specific to each case.  
6  
7  
8  
9

10  
11  
12 The performance metrics were validated through a modified Delphi  
13 expert panel consisting of 9 senior nurses and 8 medical staff who  
14 regularly facilitate NEWS/ISBAR communication training. Delphi  
15 panel members reviewed the performance metric for each of the  
16 simulation cases and the high fidelity performance outcome case and  
17 metric units were included, excluded or modified by consensus. Each  
18 metric unit was then classified as a step, error or critical error by  
19 consensus. The majority of metrics were common to both medicine  
20 and nursing. The number of metrics per case ranged from 24-26.  
21  
22  
23  
24  
25  
26  
27  
28  
29  
30  
31  
32  
33  
34  
35

36  
37 The proficiency benchmark was set as the mean performance of  
38 qualified personnel from the respective disciplines on each case. Nine  
39 nursing and five medically qualified practitioners (who regularly  
40 escalate care in the acute healthcare setting and with a mean years of  
41 experience=3 years) underwent the high fidelity simulation case. The  
42 proficiency benchmark for the assessment case was set as the mean  
43 performance for each discipline as scored by two independent  
44 assessors using the pre-defined metrics. An extract from the metric  
45  
46  
47  
48  
49  
50  
51  
52  
53  
54  
55  
56  
57  
58  
59  
60

1  
2  
3 scoring sheet and proficiency benchmark for the high fidelity  
4 simulation assessment case is shown in figure 4.  
5  
6

7  
8 Digital recordings of each participant's performance of the  
9 standardised case in the high fidelity assessment suite were  
10 reviewed and scored by two independent assessors (experienced  
11 acute care nurses) using the pre-defined metrics and proficiency  
12 benchmark.  
13  
14

15  
16 The assessors underwent training on scoring the material using 10  
17 recordings of the same case obtained from non-study participants.  
18 Assessment of the digital recordings was undertaken within 2  
19 months of study participation. An inter-rater reliability of > 85% was  
20 achieved prior to commencing scoring study material. The assessors  
21 were not part of the investigator group, were blinded to the study  
22 group allocations and had no prior knowledge of any of the  
23 participants.  
24  
25  
26  
27  
28  
29  
30  
31  
32  
33  
34  
35  
36  
37  
38  
39  
40  
41  
42  
43  
44  
45  
46

### 47 **Sample size**

48  
49 Power calculation: the numbers needed in each arm was based on  
50 transfer of training (the degree to which trainees transfer the  
51 knowledge and skills acquired from one learning situation to another  
52 setting) observed in previous studies of proficiency based  
53  
54  
55  
56  
57  
58  
59  
60

1  
2  
3 progression simulation in surgery and cardiology, where transfer of  
4  
5 training rates of 42-69% have been observed <sup>1, 2, 3, 4, 5, 6</sup>. In a pilot for  
6  
7 the current study on 133 medical and nursing students in the  
8  
9 previous academic year, the transfer of training rate was observed to  
10  
11 be 16% for the proficiency based training group and 3% for the  
12  
13 standard simulation group. The pilot however was constrained by  
14  
15 the existing curriculum, which only allowed for 90 minutes training  
16  
17 time once the e-learning programme was complete. In the current  
18  
19 study a longer training time (3.5 hours) and a more rigorous  
20  
21 structure was facilitated. We therefore expected to observe an  
22  
23 increase in transfer of training to >40% based on a 3 fold increase in  
24  
25 objective, blind, assessment of proficiency when compared to the  
26  
27 control group (i.e. 9% for the E group vs. 49% for the E+PBP group).  
28  
29 A two-tailed test, with n=20 trainees in each group with an alpha of  
30  
31 5% (which corresponds to a 95% confidence interval) would yield a  
32  
33 statistical power of 89.9. Therefore 30 (15 medical and 15 nursing  
34  
35 students) were randomised to each group to allow for drop out rates  
36  
37 observed in the pilot due to students rescheduling to non-study  
38  
39 training dates as a result of conflicting demands of their curriculum.  
40  
41  
42  
43  
44  
45  
46  
47  
48  
49  
50  
51  
52  
53  
54

### 55 **Randomisation and blinding**

56  
57  
58  
59  
60

1  
2  
3 A de-identified numbered list of nursing and medical student  
4 numbers was obtained from the School of Nursing and Midwifery and  
5  
6 the School of Medicine. The lists comprised 109 third year nursing  
7  
8 and 201 final year medical students scheduled to complete an  
9  
10 interdisciplinary ISBAR training programme as part of the University  
11  
12 undergraduate curriculum in September 2016. Randomisation was  
13  
14 stratified by discipline and was conducted using a computer-  
15  
16 generated programme (GraphPad QuickCals software package,  
17  
18 [www.graphpad.com/quickcalcs/](http://www.graphpad.com/quickcalcs/)) as a two-stage process (figure 1).  
19  
20  
21  
22  
23  
24  
25  
26  
27

28 Firstly n=45 nursing and n=45 medical students were randomly  
29  
30 selected using the programme. These 90 students were then  
31  
32 randomly allocated by discipline using the same computer  
33  
34 programme to one of the three training groups: E, E+S, and E+PBP.  
35  
36 Subjects were excluded from the study if: (i) a certificate of  
37  
38 successful completion (within the previous 4 weeks) of the National  
39  
40 Early Warning Score (NEWS) e-learning education programme was  
41  
42 not presented on the day of training, (ii) lack of consent.  
43  
44  
45  
46  
47  
48  
49  
50  
51

## 52 **Statistical analysis**

53  
54  
55 Statistical Analysis was performed with SPSS 22 (Armonk, New  
56  
57 York). The Kruskal-Wallis test was used to determine if there was a  
58  
59  
60

1  
2  
3 statistical difference between groups in relation to the primary end  
4  
5  
6 point (the numbers reaching proficiency) and the secondary end  
7  
8  
9 points (the number of completed steps, errors and critical errors).  
10  
11 The relationship of the three training programmes on proficiency  
12  
13  
14 was explored using logistic regression analysis.  
15  
16

## 17 Patient and Public Involvement

18  
19  
20 Patients were not involved in the design or conduct of the study.  
21  
22

## 23 Results

24  
25  
26 Baseline characteristics with respect to age, gender, discipline,  
27  
28  
29 nationality and first language of the participants in each group are  
30  
31  
32 shown in table 1.  
33  
34  
35  
36  
37  
38  
39

40  
41  
42  
43  
44  
45  
46  
47  
48  
49  
50  
51  
52  
53  
54  
55  
56  
57  
58  
59  
60  
Table 1

| Study Group           |                   | E          | E+S        | E+PBP      | Total      |
|-----------------------|-------------------|------------|------------|------------|------------|
|                       |                   | n=30       | n=30       | n=30       | n=90       |
| <b>Discipline</b>     | Nursing (%)       | 15 (50.0%) | 15 (50.0%) | 15 (50.0%) | 45 (50.0%) |
|                       | Medicine (%)      | 15 (50.0%) | 15 (50.0%) | 15 (50.0%) | 45 (50.0%) |
| <b>Age Group</b>      | 18-23 years (%)   | 21 (70.0%) | 19 (63.3%) | 20 (66.7%) | 60 (66.7%) |
|                       | 24-29 years (%)   | 7 (23.3%)  | 8 (26.7%)  | 9 (30.0%)  | 24 (26.7%) |
|                       | >30 years (%)     | 2 (6.7%)   | 3 (10.0%)  | 1 (3.3%)   | 6 (6.7%)   |
| <b>Gender</b>         | Male (%)          | 6 (20.0%)  | 5 (16.7%)  | 6 (20.0%)  | 17 (18.9%) |
|                       | Female (%)        | 24 (80.0%) | 22 (83.3%) | 24 (80.0%) | 73 (81.1%) |
| <b>Nationality</b>    | Irish (%)         | 22 (73.3%) | 24 (80.0%) | 21 (70.0%) | 67 (74.4%) |
|                       | Non-Irish (%)     | 8 (26.7%)  | 6 (20.0%)  | 9 (30.0%)  | 23 (25.6%) |
| <b>First Language</b> | English (%)       | 25 (83.3%) | 22 (73.3%) | 19 (63.3%) | 66 (73.3%) |
|                       | Other (%)         | 5 (16.7%)  | 4 (13.3%)  | 7 (23.3%)  | 16 (17.8%) |
|                       | Not available (%) | -          | 4 (13.3%)  | 4 (13.3%)  | 8 (8.9%)   |

Figure 5 shows percentages of participants in each group who demonstrated the proficiency benchmark following assessment in

1  
2  
3 the high fidelity simulation suite. At the end of training, 6.9% (2/29)  
4  
5 of the e-learning only (E) group and 13 % (3/23) of the standard  
6  
7 simulation (E+S) group demonstrated proficiency. In comparison  
8  
9 60% (15/25) of proficiency-based progression simulation (E+PBP)  
10  
11 group were proficient. The difference between the E group and the  
12  
13 E+S group was not statistically significant (Chi-Square = 0.55, 99%, CI  
14  
15 =0.63-0.66, p= 0.63) but was significant for the difference between E  
16  
17 group and the E +PBP group (Chi-Square = 22.25, CI=0.00-0.00, p <  
18  
19 0.000) and between the E+S group and the E+PBP group (Chi-Square  
20  
21 = 11.04, CI=0.00-0.00, p = 0.001).

22  
23 On logistic regression analysis (figure 6) it was found that in  
24  
25 comparison to the E group, the E+PBP trained group were more than  
26  
27 20 times as likely to demonstrate proficiency and the difference was  
28  
29 statistically significant (Ext (B) =20.25, 95% CI=3.91-105, p<0.000).

30  
31 The E+PBP group completed significantly more steps, mean 8.5 (1.7)  
32  
33 than either the E, mean 5.8 (1.6), p<0.000 or E+S groups, mean 6.3  
34  
35 (2.1), p<0.000 group. Similarly, combined errors and critical errors  
36  
37 were significantly less in the E+PBP, mean 3.7 (1.6) than either the E,  
38  
39 mean 5.9 (2.1), p<0.000 or the E+S groups, mean 5.2 (1.5), p<0.01  
40  
41 group. Inter-rater reliability of the two assessors was 97%.

## Discussion

Our results show that addition of a proficiency-based progression simulation programme to an e-learning module can deliver a superior set of skills for ISBAR communication in relation to a deteriorating patient than an e-learning module either alone or in combination with standard simulation. Furthermore this benefit is seen within the same resources i.e. materials, timeframe, and facilitators as standard simulation. The Irish health service like its international counterparts has prioritised clinical communication as a key part of the patient safety agenda <sup>12, 13, 14, 15, 16</sup>. Clinical communication is now viewed as an essential skill and training is recommended as mandatory for all health and social care professionals <sup>13</sup>. All participants were required to produce a recent certificate of successful completion of the e-learning programme but only 6.9% of the group who undertook the e-learning module only demonstrated the proficiency benchmark. The addition of standard simulation did not significantly improve performance with only 13% of the E+S group reaching the benchmark.

It could be argued that exposure to metrics-based scoring in the practice cases resulted in better performance in the assessment case



1  
2  
3 for the E+PBP group. However this is precisely the desired effect i.e.  
4  
5  
6 that trainees know what skills need to be achieved, practice to  
7  
8  
9 achieve them to an objective pre-defined standard and transfer that  
10  
11 training to a dynamic scenario. The E+S and E+PBP groups differed in  
12  
13 only two respects: (i) practice was “repeated” in the E+S cohort as  
14  
15 opposed to “deliberate” in E+PBP cohort i.e. focused on pre-defined  
16  
17 metrics and (ii) the E+PBP group was required to reach proficiency  
18  
19 benchmarks to progress through simulation cases whereas the E+S  
20  
21 group were not. Our results demonstrate that proficiency-based  
22  
23 training can achieve skill acquisition rates of the order of 60%,  
24  
25 similar to those seen with technical skills using this approach. In a  
26  
27 study of similar experimental design, Angelo et al found that there  
28  
29 were 56% fewer intraoperative errors and 69% fewer critical errors  
30  
31 when compared to traditional training<sup>2</sup>. To our knowledge our study  
32  
33 is the first randomised trial of proficiency-based progression training  
34  
35 of a non-technical skill.  
36  
37  
38  
39  
40  
41  
42  
43  
44  
45

46  
47 The main strength of the study is the use of robust methodology to  
48  
49 determine the effectiveness of an educational intervention on  
50  
51 objectively assessed performance outcomes. The study combines the  
52  
53 rigour of a randomised controlled trial with that of an outcomes  
54  
55 based- training approach (proficiency-based progression) to clinical  
56  
57  
58  
59  
60

1  
2  
3 communication. A significant body of evidence already exists in  
4  
5  
6 relation to the use of proficiency-based progression for technical skill  
7  
8  
9 acquisition <sup>7, 8, 9, 10, 11, 12, 13</sup>. Our results support the use of proficiency-  
10  
11  
12 based progression training for communication skills also.

13  
14 Weaknesses of the study include the single centre design and the  
15  
16 application to the undergraduate population only, although the  
17  
18 training programme was designed for qualified nurses and doctors  
19  
20 also. Since the completion of study, the programme has been applied  
21  
22 successfully to both nursing and medical undergraduate programmes  
23  
24 in the university setting and to doctors in training in the hospital  
25  
26 setting. There is a need for future research on the application of the  
27  
28 programme in different clinical settings and its impact on patient  
29  
30 outcomes.  
31  
32  
33  
34  
35  
36  
37  
38

39 The study was limited by the restriction on training time. The  
40  
41 duration of simulation training for both E+S and the E+PBP groups  
42  
43 was extended to 3.5 hours from the initial pilot (1.5 hours), but was  
44  
45 still restricted by the existing undergraduate curriculum rather than  
46  
47 that which would ideally be required to train a fundamental skill.  
48  
49  
50 Skills consolidation is an important part of the learning process  
51  
52 particularly for new skills <sup>17</sup>. In the study by Angelo et al. <sup>2</sup> trainees  
53  
54 had a weekend in which to acquire, refine and consolidate their skills  
55  
56  
57  
58  
59  
60

1  
2  
3 before their proficiency assessment at the end of training. Another  
4  
5  
6 difficulty, which may have impinged on the effectiveness of training,  
7  
8  
9 was the disparity in fidelity between the paper-based training  
10  
11  
12 environment and the assessment undertaken in the high fidelity  
13  
14  
15 simulation environment. This disparity is challenging for those with  
16  
17  
18 limited clinical experience such as the undergraduate population.  
19  
20 Van Sickle et al <sup>3</sup> and Gallagher et al <sup>4</sup> have commented on the  
21  
22  
23 detrimental impact that this disparity can have on proficiency  
24  
25  
26 demonstration by trainees.

27  
28 It is now widely recognised that clinical communication skills  
29  
30  
31 underpin patient safety. Implementation of a training programme in  
32  
33  
34 relation to clinical communication has already been shown to reduce  
35  
36  
37 medical error and preventable adverse events <sup>18</sup>. There is a need for  
38  
39  
40 valid, reliable, cost efficient clinical communication training  
41  
42  
43 programmes to address this need and the impact on patient as well  
44  
45  
46 as healthcare provider outcomes.

47  
48 In summary, our study shows that proficiency-based progression is a  
49  
50  
51 more effective way to teach clinical communication for the  
52  
53  
54 deteriorating patient than e-learning either alone or in combination  
55  
56  
57 with standard simulation. Furthermore, improved performance with  
58  
59  
60 proficiency-based progression simulation was achieved with the

1  
2  
3 same training time and facilitator/student ratio as standard  
4  
5  
6 simulation.  
7  
8  
9

## 10 11 **References**

- 12  
13  
14  
15 1. Gallagher AG, Seymour NE, Jordan-Black JA, Bunting BP, McGlade  
16  
17 K, Satava RM. Prospective, randomised assessment of transfer of  
18  
19 training (ToT) and transfer effectiveness ratio (TER) of virtual reality  
20  
21 simulation training for laparoscopic skill acquisition. *Ann Surg* 2013;  
22  
23 257(6): 1025-31.  
24  
25
- 26  
27  
28 2. Angelo RL, Ryu RK, Pedowitz RA, Beach W, Burns J, Dodds J, Field  
29  
30 L et al. A Proficiency-based progression training curriculum coupled  
31  
32 with a model simulator results in the acquisition of a superior  
33  
34 arthroscopic bankart skill set. *Arthroscopy*. 2015; 31(10): 1854-71.  
35  
36
- 37  
38  
39 3. Van Sickle KR, Ritter EM, Baghai M, Goldenberg AE, Huang  
40  
41 IP, Gallagher AG, Smith CD. Prospective, randomised, double blind  
42  
43 trial of curriculum-based training for intracorporeal suturing and  
44  
45 knot tying. *J Am Coll Surg*. 2008; 207(4): 560-8.  
46  
47
- 48  
49  
50 4. Gallagher AG, O'Sullivan GC. *Fundamentals of surgical simulation;*  
51  
52 *principles & practices*: London; Springer Verlag, 2011.  
53  
54
- 55  
56  
57 5. Seymour NE, Gallagher, AG, Roman SA, O'Brien MK, Bansal VK,  
58  
59 Andersen DK, Satava RM. (2002). Virtual reality training improves  
60

- 1  
2  
3 operating room performance: results of a randomised, double-  
4  
5  
6 blinded study. *Annals of Surgery*. 2002; 236(4), 458-463.
- 7  
8  
9 6. Cates CU, Lönn L, Gallagher AG. Prospective, randomised and  
10  
11 blinded comparison of proficiency-based progression full-physics  
12  
13 virtual reality simulator training versus invasive vascular experience  
14  
15 for learning carotid artery angiography by very experienced  
16  
17 operators. *BMJ Simulation and Technology Enhanced Learning*. 2016;  
18  
19 2:1-5.
- 20  
21  
22  
23  
24  
25 7. Ahlberg G, Enochsson L, Gallagher AG, Hedman L et al. Proficiency-  
26  
27 based virtual reality training significantly reduces the error rate for  
28  
29 residents during their first 10 laparoscopic cholecystectomies. *Am J*  
30  
31 *Surg*. 2007; 193: 797-804.
- 32  
33  
34  
35  
36 8. Wilson RM, Runciman WB, Gibberd RW, et al. The quality in  
37  
38 Australian health care study. *Med J Aust*. 1995;163:458 -71.
- 39  
40  
41 9. Bhasale AL, Miller GC, Reid SE, et al. Analysing potential harm in  
42  
43 Australian general practice: an incident-monitoring study. *Med J Aust*.  
44  
45 1998;169:73 -6.
- 46  
47  
48  
49 10. National Confidential Enquiry into Patient Outcome and Death.  
50  
51 Caring to the end? A review of the care of patients who died in  
52  
53 hospital within four days of admission. *NCEPOD*, 2009.
- 54  
55  
56  
57  
58  
59  
60

1  
2  
3 11. Riesenbergr LA, Leitzsch J, Little BW. Systematic review of handoff  
4 mnemonics literature. *Am J Med Qual.* 2009;24:196-204.  
5  
6

7  
8  
9 12. National Clinical Effectiveness Committee. National Early  
10 Warning Score, National Clinical Guideline No. 1.  
11

12  
13  
14 [http://health.gov.ie/wp-content/uploads/2014/08/NEWSFull-  
16 Report-August2014.pdf](http://health.gov.ie/wp-content/uploads/2014/08/NEWSFull-<br/>15 Report-August2014.pdf)  
17

18  
19 13. National Clinical Effectiveness Committee. Communication  
20 (Clinical Handover) in Acute and Children's Hospital Services,  
21 National Clinical Guideline No. 11. [http://health.gov.ie/wp-  
24 content/uploads/2015/12/NCG-No-11-Clinical-Handover-Acute-  
25 and-Childrens-Hospital-Services-Full-Report.pdf](http://health.gov.ie/wp-<br/>22 content/uploads/2015/12/NCG-No-11-Clinical-Handover-Acute-<br/>23 and-Childrens-Hospital-Services-Full-Report.pdf)  
26  
27

28  
29 14. British Medical Association. Safe handover: safe patients.  
30 Guidance on clinical handover for clinicians and managers. London:  
31 BMA. 2004. <http://www.bma.org.uk/ap.nsf/Content/Handover>  
32

33  
34 15. Australian Medical Association 2006, Safe Handover-safe  
35 patients: guidance on clinical handover for clinicians and managers.  
36  
37  
38  
39  
40  
41  
42  
43  
44  
45  
46  
47  
48  
49  
50  
51  
52  
53  
54  
55  
56  
57  
58  
59  
60  
[https://ama.com.au/sites/default/files/documents/Clinical\\_Handover\\_0.pdf](https://ama.com.au/sites/default/files/documents/Clinical_Handover_0.pdf)

16. Joint Commission on Accreditation of Healthcare Organizations. National patient safety goals. *Joint Commission.* 2005.

1  
2  
3  
4  
5  
6  
7  
8  
9  
10  
11  
12  
13  
14  
15  
16  
17  
18  
19  
20  
21  
22  
23  
24  
25  
26  
27  
28  
29  
30  
31  
32  
33  
34  
35  
36  
37  
38  
39  
40  
41  
42  
43  
44  
45  
46  
47  
48  
49  
50  
51  
52  
53  
54  
55  
56  
57  
58  
59  
60

<https://www.jointcommission.org/PatientSafety/NationalPatientSafetyGoals/>.

17. Keane MT, Eysenck MW. Cognitive Psychology: A student's handbook: *Psychology Press*, 2000.

18. Starmer AJ, Spector ND, Srivastava R, West DC et al. Changes in medical errors after implementation of a handoff program. *N Engl J Med* 2014; 371:1803-1812.

## Legends

Table 1. Demographic characteristics of the three study groups: e-learning alone (E), e-learning plus standard simulation (E+S) and e-learning plus proficiency-based progression simulation (E+PBP) .

Figure 1. Consort diagram outlining selection, allocation and follow up of undergraduate medical and nursing participants in a study comparing the effect of e-learning alone (E), e-learning plus standard simulation (E+S) and e-learning plus proficiency-based progression simulation (E+PBP) on clinical communication.

Figure 2. Outline of experimental design and study flow indicating training interventions and assessment of the three study training

1  
2  
3 groups (E, E+S, E+PBP) of undergraduate medical and nursing  
4  
5  
6 participants.  
7  
8  
9

10  
11 Figure 3. Outline of the high fidelity simulation performance  
12  
13  
14 assessment case for nursing undergraduates  
15  
16  
17

18  
19  
20 Figure 4. Extract from the nursing metric scoring sheet illustrating  
21  
22 some of the metrics and the proficiency benchmark for the high  
23  
24 fidelity simulation assessment case.  
25  
26  
27

28  
29  
30 Figure 5. The percentages reaching the proficiency benchmark at the  
31  
32 end of training of the three study training groups; e-learning alone  
33  
34 (E), e-learning plus standard simulation training (E+S) and e-learning  
35  
36 plus proficiency-based progression simulation training (E+PBP).  
37  
38  
39  
40  
41

42  
43  
44 Figure 6. Logistic regression analysis for the relative differences  
45  
46  
47 between the three study training groups of undergraduate medical  
48  
49 and nursing participants; E, E+S and E+PBP.  
50  
51  
52  
53  
54  
55  
56  
57  
58  
59  
60



1  
2  
3  
4  
5  
6  
7  
8  
9  
10  
11  
12  
13  
14  
15  
16  
17  
18  
19  
20  
21  
22  
23  
24  
25  
26  
27  
28  
29  
30  
31  
32  
33  
34  
35  
36  
37  
38  
39  
40  
41  
42  
43  
44  
45  
46  
47  
48  
49  
50  
51  
52  
53  
54  
55  
56  
57  
58  
59  
60

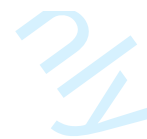

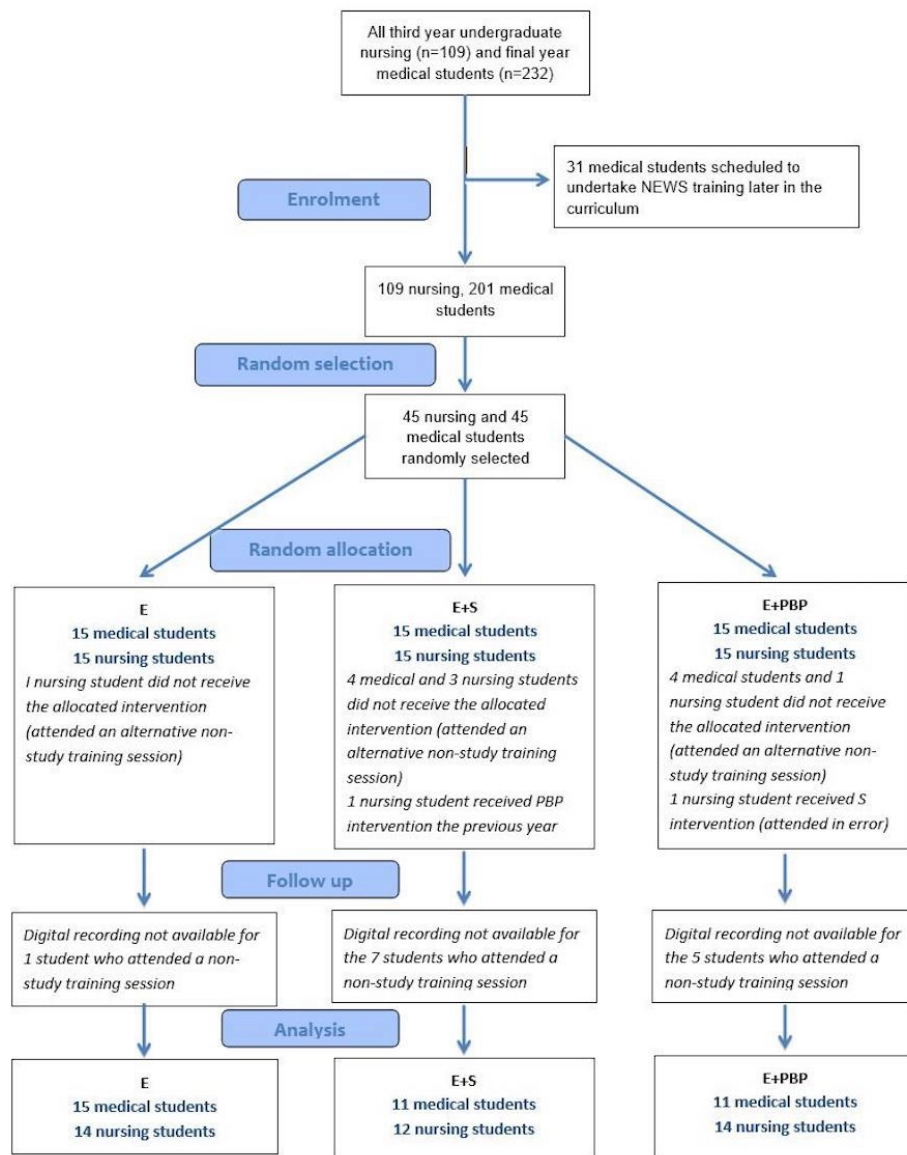

Figure 1. Consort diagram outlining selection, allocation and follow up of undergraduate medical and nursing participants in a study comparing the effect of e-learning alone (E), e-learning plus standard simulation (E+S) and e-learning plus proficiency-based progression simulation (E+PBP) on clinical communication.

76x98mm (300 x 300 DPI)

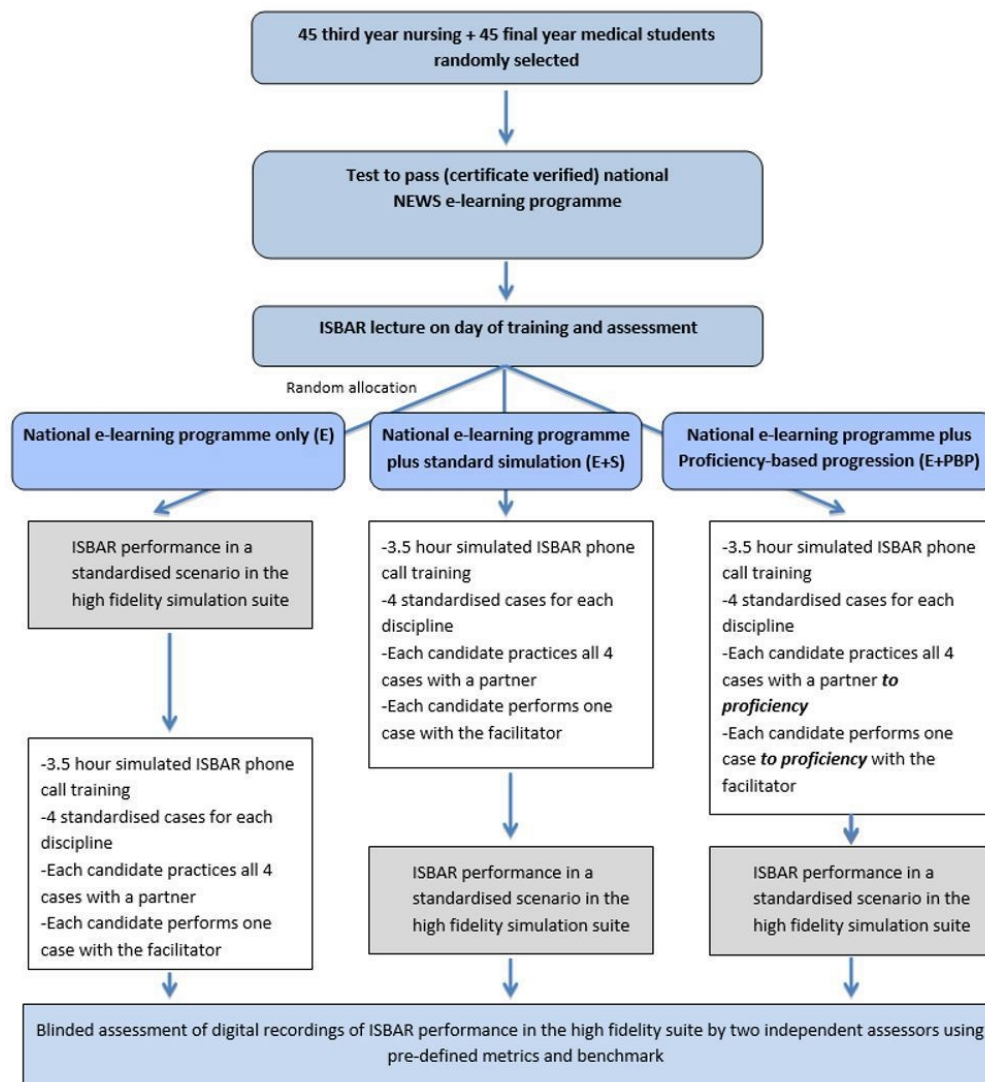

Figure 2. Outline of experimental design and study flow indicating training interventions and assessment of the three study training groups (E, E+S, E+PBP) of undergraduate medical and nursing participants.

82x90mm (300 x 300 DPI)

| Simulator Parameters |                              | Roleplayer vocals                                                                                                                                                                                                                                                    | Escalation Call                                                                                                           |  |
|----------------------|------------------------------|----------------------------------------------------------------------------------------------------------------------------------------------------------------------------------------------------------------------------------------------------------------------|---------------------------------------------------------------------------------------------------------------------------|--|
| 2                    | RR                           | 21                                                                                                                                                                                                                                                                   | 2 days post laparotomy                                                                                                    |  |
| 3                    | SpO <sub>2</sub>             | 96%                                                                                                                                                                                                                                                                  | you feel <b>very tired and weak</b>                                                                                       |  |
| 4                    | oxygen                       | Room Air                                                                                                                                                                                                                                                             | you think you should be feeling better than you are                                                                       |  |
| 5                    | BP                           | 92/58                                                                                                                                                                                                                                                                | Do not ask any questions or provide any information throughout this phone-call except to answer the below questions       |  |
| 6                    | HR                           | 98                                                                                                                                                                                                                                                                   | you thought you would be improving at this stage                                                                          |  |
| 7                    | AVPU                         | Alert                                                                                                                                                                                                                                                                | if asked you feel your pain is less controlled than yesterday                                                             |  |
| 8                    | Temp                         | 36.7                                                                                                                                                                                                                                                                 | you are still nil by mouth                                                                                                |  |
| 9                    | EWS                          | 5                                                                                                                                                                                                                                                                    | you now have a temporary ileostomy and are a quite upset about this, but know it will hopefully be reversed in the future |  |
| 10                   | Cardiac monitor              | Sinus tachycardia (if attached to CM)                                                                                                                                                                                                                                |                                                                                                                           |  |
| 11                   | Cap refill                   | less than 2sec                                                                                                                                                                                                                                                       |                                                                                                                           |  |
| 12                   | skin                         | pink, warm, dry                                                                                                                                                                                                                                                      |                                                                                                                           |  |
| 13                   | Urinary output (0.5ml/kg/hr) | 20mls last hour                                                                                                                                                                                                                                                      | If recipient name not confirmed, and you are asked "is this the intern/SHO/reg?"                                          |  |
| 14                   | IV site                      | VIP = 0 [visual infusion phlebitis score]                                                                                                                                                                                                                            | If asked for any recommendation                                                                                           |  |
| 15                   | IV hydration                 | 125mls/hr                                                                                                                                                                                                                                                            | If told "I think she is bleeding/needs review/has sepsis"                                                                 |  |
| 16                   | Pain                         | <b>Student to assess</b><br>if asked for PCA - 32mls in syringe; 35 demands, 18 successful]                                                                                                                                                                          | If asked "Will you review her?"                                                                                           |  |
| 17                   | Bowel sounds                 | <b>Student to assess</b> absent                                                                                                                                                                                                                                      | If asked "When will you review her?"                                                                                      |  |
| 18                   | Abdomen                      | <b>wound</b> - assess independently<br><b>drain</b> assess independently<br><b>ileostomy</b> : assess independently<br><b>distension</b> yes abdomen is distended                                                                                                    | If told "Her EWS is (3-7), so you must review her in 30mins"                                                              |  |
| 19                   | Blood Loss                   | <b>If students enquire requiring volume in drain/ileostomy</b> - say "you may assess independently"<br>If students pick up a jug to empty either give them the relevant volume " <b>there are 250mls in the drain</b> " " <b>there are 100mls in the ileostomy</b> " | If asked "Will you review her in 30 minutes/straight away?"                                                               |  |
| 20                   | Chest sounds                 | normal                                                                                                                                                                                                                                                               |                                                                                                                           |  |
| 21                   | Cap blood sugar              | 5.8mmol/L                                                                                                                                                                                                                                                            |                                                                                                                           |  |

| Extract from Nursing Simulation Metric                                                                                 |   |                                                                                                                                                                                                                                   |                                        |                                         |                                                             |
|------------------------------------------------------------------------------------------------------------------------|---|-----------------------------------------------------------------------------------------------------------------------------------------------------------------------------------------------------------------------------------|----------------------------------------|-----------------------------------------|-------------------------------------------------------------|
|                                                                                                                        |   |                                                                                                                                                                                                                                   | Tick if present                        | Tick if present                         | Tick if present                                             |
| 16                                                                                                                     | S | States the situation<br><i>There is 100-300mls of blood in drain or if not exact volume qualifies with (a lot, significant amount, unusual amount, quite a bit) AND/OR states blood in ileostomy bag no qualification needed.</i> |                                        |                                         |                                                             |
| 17                                                                                                                     | S | States the situation<br><i>Her urinary output 20mls/hr</i>                                                                                                                                                                        |                                        |                                         |                                                             |
| 18                                                                                                                     | S | States the situation<br><b>States patient is on IV fluids</b>                                                                                                                                                                     |                                        |                                         |                                                             |
| 19                                                                                                                     | B | Background information<br><i>States she has history of Crohn's disease states history</i>                                                                                                                                         |                                        |                                         |                                                             |
| 20                                                                                                                     | B | Background information<br><i>States she is two days post laparotomy/ileostomy/bowel resection</i>                                                                                                                                 |                                        |                                         |                                                             |
| 21                                                                                                                     | B | Irrelevant background<br><i>States fractured humerus two years ago</i>                                                                                                                                                            |                                        |                                         |                                                             |
| 22                                                                                                                     | A | Assessment<br><i>Gives relevant case specific assessment</i>                                                                                                                                                                      |                                        |                                         |                                                             |
| 23                                                                                                                     | A | Assessment<br><i>I think she is bleeding</i><br>+/- patient is hypovolemic                                                                                                                                                        |                                        |                                         |                                                             |
| 24                                                                                                                     | R | Seeks a recommendation from recipient<br><i>Do you want me to do anything else/what else would you recommend?</i>                                                                                                                 |                                        |                                         |                                                             |
| 25                                                                                                                     | R | Omits to "repeat back"<br><i>You would like me to give her a fluid bolus of 500mls and the time frame agreed for review</i><br><i>[eg: straight away/ in 30 minutes]</i>                                                          |                                        |                                         |                                                             |
| 26                                                                                                                     | R | Uses own notes and/or an ISBAR sticker to aid phone call                                                                                                                                                                          |                                        |                                         |                                                             |
| 27                                                                                                                     |   | Length of call [seconds]                                                                                                                                                                                                          | secs                                   |                                         |                                                             |
|                                                                                                                        |   |                                                                                                                                                                                                                                   | no. of steps =<br>no. of boxes checked | no. of errors =<br>no. of boxes checked | no. of critical errors =<br>no. of boxes <b>NOT</b> checked |
| <b>TOTALS</b>                                                                                                          |   |                                                                                                                                                                                                                                   |                                        |                                         |                                                             |
| <b>Proficiency Benchmark</b>                                                                                           |   | <b>Proficiency Demonstrated</b> [tick box]                                                                                                                                                                                        | <b>Observer's Initial</b>              |                                         |                                                             |
| <ul style="list-style-type: none"> <li>Steps ≥ 6</li> <li>No more than 4 Errors, 3 of which may be critical</li> </ul> |   | <input type="checkbox"/> YES <input type="checkbox"/> NO                                                                                                                                                                          |                                        |                                         |                                                             |

1  
2  
3  
4  
5  
6  
7  
8  
9  
10  
11  
12  
13  
14  
15  
16  
17  
18  
19  
20  
21  
22  
23  
24  
25  
26  
27  
28  
29  
30  
31  
32  
33  
34  
35  
36  
37  
38  
39  
40  
41

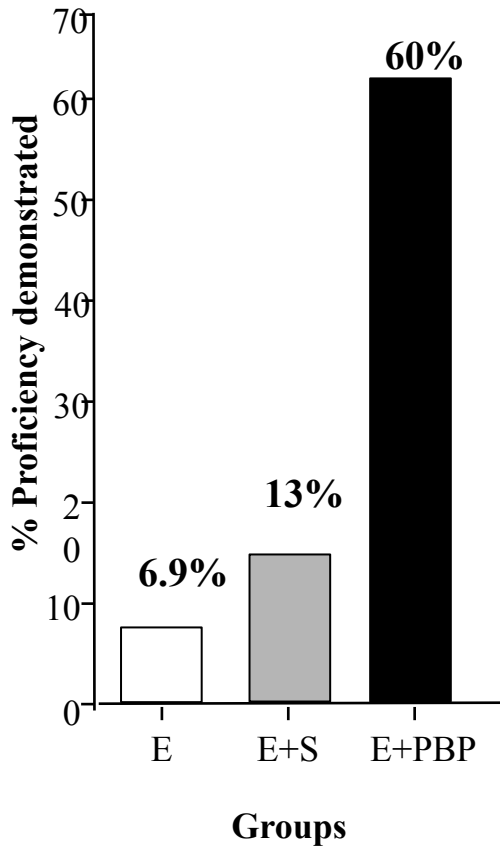

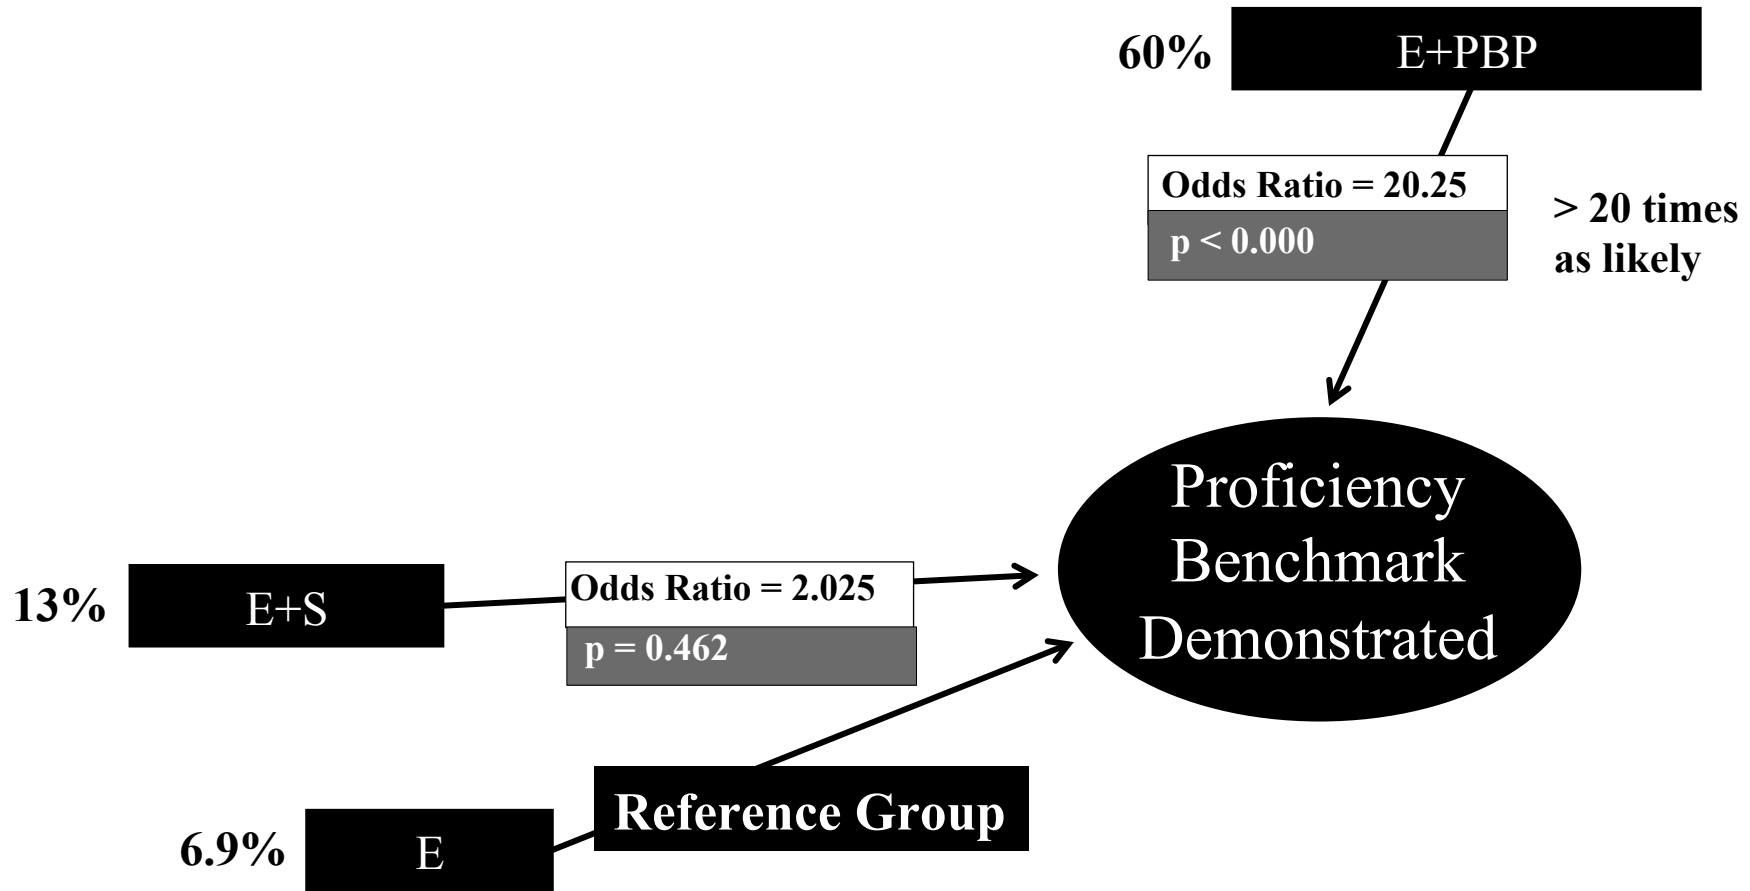



## CONSORT 2010 checklist of information to include when reporting a randomised trial\*

| Section/Topic                    | Item No | Checklist item                                                                                                                                                                              | Reported on page No   |
|----------------------------------|---------|---------------------------------------------------------------------------------------------------------------------------------------------------------------------------------------------|-----------------------|
| <b>Title and abstract</b>        |         |                                                                                                                                                                                             |                       |
|                                  | 1a      | Identification as a randomised trial in the title                                                                                                                                           | 1                     |
|                                  | 1b      | Structured summary of trial design, methods, results, and conclusions (for specific guidance see CONSORT for abstracts)                                                                     | 1-3                   |
| <b>Introduction</b>              |         |                                                                                                                                                                                             |                       |
| Background and objectives        | 2a      | Scientific background and explanation of rationale                                                                                                                                          | 5                     |
|                                  | 2b      | Specific objectives or hypotheses                                                                                                                                                           | 7                     |
| <b>Methods</b>                   |         |                                                                                                                                                                                             |                       |
| Trial design                     | 3a      | Description of trial design (such as parallel, factorial) including allocation ratio                                                                                                        | 7                     |
|                                  | 3b      | Important changes to methods after trial commencement (such as eligibility criteria), with reasons                                                                                          | n/a                   |
| Participants                     | 4a      | Eligibility criteria for participants                                                                                                                                                       | 8                     |
|                                  | 4b      | Settings and locations where the data were collected                                                                                                                                        | 8                     |
| Interventions                    | 5       | The interventions for each group with sufficient details to allow replication, including how and when they were actually administered                                                       | 8/9/10/11<br>Figure 2 |
| Outcomes                         | 6a      | Completely defined pre-specified primary and secondary outcome measures, including how and when they were assessed                                                                          | 11 and 5<br>protocol  |
|                                  | 6b      | Any changes to trial outcomes after the trial commenced, with reasons                                                                                                                       | n/a                   |
| Sample size                      | 7a      | How sample size was determined                                                                                                                                                              | 13                    |
|                                  | 7b      | When applicable, explanation of any interim analyses and stopping guidelines                                                                                                                | n/a                   |
| <b>Randomisation:</b>            |         |                                                                                                                                                                                             |                       |
| Sequence generation              | 8a      | Method used to generate the random allocation sequence                                                                                                                                      | 14                    |
|                                  | 8b      | Type of randomisation; details of any restriction (such as blocking and block size)                                                                                                         | 14                    |
| Allocation concealment mechanism | 9       | Mechanism used to implement the random allocation sequence (such as sequentially numbered containers), describing any steps taken to conceal the sequence until interventions were assigned | 14                    |
| Implementation                   | 10      | Who generated the random allocation sequence, who enrolled participants, and who assigned participants to interventions                                                                     | 2/3 protocol          |
| Blinding                         | 11a     | If done, who was blinded after assignment to interventions (for example, participants, care providers, those                                                                                | 14, 15                |



|                                                      |     |                                                                                                                                                   |                                   |
|------------------------------------------------------|-----|---------------------------------------------------------------------------------------------------------------------------------------------------|-----------------------------------|
|                                                      |     | assessing outcomes) and how                                                                                                                       |                                   |
|                                                      | 11b | If relevant, description of the similarity of interventions                                                                                       | 8/9/10/11                         |
| Statistical methods                                  | 12a | Statistical methods used to compare groups for primary and secondary outcomes                                                                     | 15                                |
|                                                      | 12b | Methods for additional analyses, such as subgroup analyses and adjusted analyses                                                                  | n/a                               |
| <b>Results</b>                                       |     |                                                                                                                                                   |                                   |
| Participant flow (a diagram is strongly recommended) | 13a | For each group, the numbers of participants who were randomly assigned, received intended treatment, and were analysed for the primary outcome    | Figure 1                          |
|                                                      | 13b | For each group, losses and exclusions after randomisation, together with reasons                                                                  | Figure 1                          |
| Recruitment                                          | 14a | Dates defining the periods of recruitment and follow-up                                                                                           | 8                                 |
|                                                      | 14b | Why the trial ended or was stopped                                                                                                                | n/a                               |
| Baseline data                                        | 15  | A table showing baseline demographic and clinical characteristics for each group                                                                  | Table 1                           |
| Numbers analysed                                     | 16  | For each group, number of participants (denominator) included in each analysis and whether the analysis was by original assigned groups           | Figure 1                          |
| Outcomes and estimation                              | 17a | For each primary and secondary outcome, results for each group, and the estimated effect size and its precision (such as 95% confidence interval) | 15,16                             |
|                                                      | 17b | For binary outcomes, presentation of both absolute and relative effect sizes is recommended                                                       | 15,16                             |
| Ancillary analyses                                   | 18  | Results of any other analyses performed, including subgroup analyses and adjusted analyses, distinguishing pre-specified from exploratory         | n/a                               |
| Harms                                                | 19  | All important harms or unintended effects in each group (for specific guidance see CONSORT for harms)                                             | n/a                               |
| <b>Discussion</b>                                    |     |                                                                                                                                                   |                                   |
| Limitations                                          | 20  | Trial limitations, addressing sources of potential bias, imprecision, and, if relevant, multiplicity of analyses                                  | 15/16                             |
| Generalisability                                     | 21  | Generalisability (external validity, applicability) of the trial findings                                                                         | 19                                |
| Interpretation                                       | 22  | Interpretation consistent with results, balancing benefits and harms, and considering other relevant evidence                                     | 19                                |
| <b>Other information</b>                             |     |                                                                                                                                                   |                                   |
| Registration                                         | 23  | Registration number and name of trial registry                                                                                                    | ClinicalTrials.gov<br>NCT02886754 |
| Protocol                                             | 24  | Where the full trial protocol can be accessed, if available                                                                                       | Attached, Clinical trials.gov,    |

1  
2  
3  
4  
5  
6  
7  
8  
9  
10  
11  
12  
13  
14  
15  
16  
17  
18  
19  
20  
21  
22  
23  
24  
25  
26  
27  
28  
29  
30  
31  
32  
33  
34  
35  
36  
37  
38  
39  
40  
41  
42  
43  
44  
45  
46  
47

and attached  
none

Funding 25 Sources of funding and other support (such as supply of drugs), role of funders

\*We strongly recommend reading this statement in conjunction with the CONSORT 2010 Explanation and Elaboration for important clarifications on all the items. If relevant, we also recommend reading CONSORT extensions for cluster randomised trials, non-inferiority and equivalence trials, non-pharmacological treatments, herbal interventions, and pragmatic trials. Additional extensions are forthcoming: for those and for up to date references relevant to this checklist, see [www.consort-statement.org](http://www.consort-statement.org).

For peer review only
